# Supplementary material
Source: publisher figshare collection journal article supplement (https://acs.figshare.com/ndownloader/files/4057282)
Supplement: Supplementary file 1 [file 4057282]

data_publication_text
_publ_requested_journal          Organometallics
_publ_contact_author_name        'Klaus Jurkschat'
_publ_contact_author_address     
;Lehrstuhl f\"ur Anorganische Chemie II
Technischen Universit\"at Dortmund
D-44221 Dortmund
;
_publ_contact_author_email       klaus.jurkschat@tu-dortmund.de
loop_
_publ_author_name
_publ_author_address
'Arens, Verena'
;Lehrstuhl f\"ur Anorganische Chemie II
Technischen Universit\"at Dortmund
D-44221 Dortmund
;
'Dietz, Christina'
;Lehrstuhl f\"ur Anorganische Chemie II
Technischen Universit\"at Dortmund
D-44221 Dortmund
;
'Schollmeyer, Dieter'
;Institut f\"ur Organische Chemie
Gutenberg-Universit\"at Mainz
D-55099 Mainz
;
'Jurkschat, Klaus'
;Lehrstuhl f\"ur Anorganische Chemie II
Technischen Universit\"at Dortmund
D-44221 Dortmund
;

data_compound4_a1383i 
 
_audit_creation_method            SHELXL-97 
_chemical_name_systematic 
; 
dibromido-bis(1,4,7,10,13-pentaoxacyclohexadec-15-ylmethyl)-stannane 
; 
_chemical_name_common             ? 
_chemical_melting_point           396 
_chemical_formula_moiety          'C24 H46 Br2 O10 Sn' 
_chemical_formula_sum 
 'C24 H46 Br2 O10 Sn' 
_chemical_formula_weight          773.12 
 
loop_ 
 _atom_type_symbol 
 _atom_type_description 
 _atom_type_scat_dispersion_real 
 _atom_type_scat_dispersion_imag 
 _atom_type_scat_source 
 'C'  'C'   0.0033   0.0016 
 'International Tables Vol C Tables 4.2.6.8 and 6.1.1.4' 
 'H'  'H'   0.0000   0.0000 
 'International Tables Vol C Tables 4.2.6.8 and 6.1.1.4' 
 'O'  'O'   0.0106   0.0060 
 'International Tables Vol C Tables 4.2.6.8 and 6.1.1.4' 
 'Br'  'Br'  -0.2901   2.4595 
 'International Tables Vol C Tables 4.2.6.8 and 6.1.1.4' 
 'Sn'  'Sn'  -0.6537   1.4246 
 'International Tables Vol C Tables 4.2.6.8 and 6.1.1.4' 
 
_symmetry_cell_setting            monoclinic 
_symmetry_space_group_name_H-M   'I2/a'  
_symmetry_space_group_name_Hall  '-I 2ya' 
 
loop_ 
 _symmetry_equiv_pos_as_xyz 
 'x, y, z' 
 '-x+1/2, y, -z' 
 'x+1/2, y+1/2, z+1/2' 
 '-x+1, y+1/2, -z+1/2' 
 '-x, -y, -z' 
 'x-1/2, -y, z' 
 '-x+1/2, -y+1/2, -z+1/2' 
 'x, -y+1/2, z+1/2' 
 
_cell_length_a                    16.1335(19) 
_cell_length_b                    11.5894(7) 
_cell_length_c                    16.415(3) 
_cell_angle_alpha                 90.00 
_cell_angle_beta                  100.304(18) 
_cell_angle_gamma                 90.00 
_cell_volume                      3019.7(7) 
_cell_formula_units_Z             4 
_cell_measurement_temperature     173(2) 
_cell_measurement_reflns_used     5115
_cell_measurement_theta_min       2.5172
_cell_measurement_theta_max       29.0164 
 
_exptl_crystal_description        block 
_exptl_crystal_colour             colourless 
_exptl_crystal_size_max           0.50 
_exptl_crystal_size_mid           0.37 
_exptl_crystal_size_min           0.30 
_exptl_crystal_density_meas       ? 
_exptl_crystal_density_diffrn     1.701 
_exptl_crystal_density_method     'not measured' 
_exptl_crystal_F_000              1560 
_exptl_absorpt_coefficient_mu     3.542 
_exptl_absorpt_correction_type    'multi-scan' 
_exptl_absorpt_correction_T_min   0.79387
_exptl_absorpt_correction_T_max   1.00000 
_exptl_absorpt_process_details
;
CrysAlisPro, Oxford Diffraction Ltd.,
Version 1.171.33.55 (release 05-01-2010 CrysAlis171 .NET)
(compiled Jan  5 2010,16:28:46)
Empirical absorption correction using spherical harmonics,
 implemented in SCALE3 ABSPACK scaling algorithm.
; 
 
_diffrn_ambient_temperature       173(2) 
_diffrn_radiation_wavelength      0.71073 
_diffrn_radiation_type            MoK\a 
_diffrn_radiation_source          'fine-focus sealed tube'
_diffrn_measurement_device        'Xcalibur2 CCD Diffractometer'  
_diffrn_radiation_monochromator   graphite 
_diffrn_measurement_device_type   ? 
_diffrn_measurement_method        '\w und \y scan' 
_diffrn_detector_area_resol_mean  ? 
_diffrn_standards_number          ? 
_diffrn_standards_interval_count  ? 
_diffrn_standards_interval_time   ? 
_diffrn_standards_decay_%         ? 
_diffrn_reflns_number             9403 
_diffrn_reflns_av_R_equivalents   0.0294 
_diffrn_reflns_av_sigmaI/netI     0.0468 
_diffrn_reflns_limit_h_min        -19 
_diffrn_reflns_limit_h_max        19 
_diffrn_reflns_limit_k_min        -13 
_diffrn_reflns_limit_k_max        14 
_diffrn_reflns_limit_l_min        -19 
_diffrn_reflns_limit_l_max        19 
_diffrn_reflns_theta_min          2.52 
_diffrn_reflns_theta_max          25.50 
_reflns_number_total              2814 
_reflns_number_gt                 2135 
_reflns_threshold_expression      >2sigma(I) 
 
_computing_data_collection        
;CrysAlisPro, Oxford Diffraction Ltd., Version 1.171.33.55'
;  
_computing_cell_refinement        
;CrysAlisPro, Oxford Diffraction Ltd., Version 1.171.33.55'
;
_computing_data_reduction         
;CrysAlisPro, Oxford Diffraction Ltd., Version 1.171.33.55'
;
_computing_structure_solution     'SHELXS-97 (Sheldrick, 1990)' 
_computing_structure_refinement   'SHELXL-97 (Sheldrick, 1997)' 
_computing_molecular_graphics     'SHELXP-97 (Sheldrick, 1997)' 
_computing_publication_material   'enCIFer Version 1.4'  
 
_refine_special_details 
; 
 Refinement of F^2^ against ALL reflections.  The weighted R-factor wR and 
 goodness of fit S are based on F^2^, conventional R-factors R are based 
 on F, with F set to zero for negative F^2^. The threshold expression of 
 F^2^ > 2sigma(F^2^) is used only for calculating R-factors(gt) etc. and is 
 not relevant to the choice of reflections for refinement.  R-factors based 
 on F^2^ are statistically about twice as large as those based on F, and R- 
 factors based on ALL data will be even larger. 
; 
 
_refine_ls_structure_factor_coef  Fsqd  
_refine_ls_matrix_type            full 
_refine_ls_weighting_scheme       calc  
_refine_ls_weighting_details 
 'calc w=1/[\s^2^(Fo^2^)+(0.0251P)^2^+0.0000P] where P=(Fo^2^+2Fc^2^)/3' 
_atom_sites_solution_primary      direct 
_atom_sites_solution_secondary    difmap 
_atom_sites_solution_hydrogens    geom 
_refine_ls_hydrogen_treatment     constr
_refine_ls_extinction_method      none 
_refine_ls_extinction_coef        ? 
_refine_ls_number_reflns          2814 
_refine_ls_number_parameters      168 
_refine_ls_number_restraints      0 
_refine_ls_R_factor_all           0.0368 
_refine_ls_R_factor_gt            0.0239 
_refine_ls_wR_factor_ref          0.0505 
_refine_ls_wR_factor_gt           0.0495 
_refine_ls_goodness_of_fit_ref    0.922 
_refine_ls_restrained_S_all       0.922 
_refine_ls_shift/su_max           0.001 
_refine_ls_shift/su_mean          0.000 
 
loop_ 
 _atom_site_label 
 _atom_site_type_symbol 
 _atom_site_fract_x 
 _atom_site_fract_y 
 _atom_site_fract_z 
 _atom_site_U_iso_or_equiv 
 _atom_site_adp_type 
 _atom_site_occupancy 
 _atom_site_symmetry_multiplicity 
 _atom_site_calc_flag 
 _atom_site_refinement_flags 
 _atom_site_disorder_assembly 
 _atom_site_disorder_group 
Sn1 Sn 0.2500 0.94917(3) 0.0000 0.01840(9) Uani 1 2 d S . . 
Br1 Br 0.207443(18) 0.79709(3) 0.097436(18) 0.02864(10) Uani 1 1 d . . . 
O1 O 0.23334(10) 1.09141(18) 0.11651(11) 0.0252(5) Uani 1 1 d . . . 
C1 C 0.37306(15) 1.0096(3) 0.05241(17) 0.0189(7) Uani 1 1 d . . . 
H1A H 0.3994 0.9553 0.0961 0.023 Uiso 1 1 calc R . . 
H1B H 0.4084 1.0116 0.0089 0.023 Uiso 1 1 calc R . . 
C2 C 0.36996(16) 1.1289(3) 0.08932(17) 0.0250(7) Uani 1 1 d . . . 
H2A H 0.3464 1.1838 0.0440 0.030 Uiso 1 1 calc R . . 
O2 O 0.24692(12) 1.09638(18) 0.30466(12) 0.0288(5) Uani 1 1 d . . . 
C3 C 0.31559(16) 1.1322(3) 0.15376(17) 0.0265(8) Uani 1 1 d . . . 
H3A H 0.3396 1.0824 0.2011 0.032 Uiso 1 1 calc R . . 
H3B H 0.3119 1.2120 0.1743 0.032 Uiso 1 1 calc R . . 
O3 O 0.41389(12) 1.0991(2) 0.39081(13) 0.0388(6) Uani 1 1 d . . . 
O4 O 0.51953(13) 1.2623(2) 0.32505(13) 0.0388(6) Uani 1 1 d . . . 
C4 C 0.16937(16) 1.1100(3) 0.16646(18) 0.0301(8) Uani 1 1 d . . . 
H4A H 0.1140 1.0884 0.1336 0.036 Uiso 1 1 calc R . . 
H4B H 0.1674 1.1933 0.1794 0.036 Uiso 1 1 calc R . . 
O5 O 0.45174(12) 1.2845(2) 0.15492(12) 0.0324(6) Uani 1 1 d . . . 
C5 C 0.18268(19) 1.0438(3) 0.24555(19) 0.0352(8) Uani 1 1 d . . . 
H5A H 0.1295 1.0413 0.2677 0.042 Uiso 1 1 calc R . . 
H5B H 0.1991 0.9635 0.2352 0.042 Uiso 1 1 calc R . . 
C6 C 0.2754(2) 1.0266(3) 0.3739(2) 0.0407(9) Uani 1 1 d . . . 
H6A H 0.2963 0.9522 0.3559 0.049 Uiso 1 1 calc R . . 
H6B H 0.2283 1.0104 0.4036 0.049 Uiso 1 1 calc R . . 
C7 C 0.3442(2) 1.0869(3) 0.4300(2) 0.0461(10) Uani 1 1 d . . . 
H7A H 0.3246 1.1639 0.4445 0.055 Uiso 1 1 calc R . . 
H7B H 0.3603 1.0421 0.4818 0.055 Uiso 1 1 calc R . . 
C8 C 0.4805(2) 1.1621(3) 0.43843(19) 0.0435(10) Uani 1 1 d . . . 
H8A H 0.5034 1.1190 0.4896 0.052 Uiso 1 1 calc R . . 
H8B H 0.4594 1.2375 0.4545 0.052 Uiso 1 1 calc R . . 
C9 C 0.54753(19) 1.1802(3) 0.3887(2) 0.0440(10) Uani 1 1 d . . . 
H9A H 0.5993 1.2087 0.4247 0.053 Uiso 1 1 calc R . . 
H9B H 0.5609 1.1063 0.3637 0.053 Uiso 1 1 calc R . . 
C10 C 0.57298(18) 1.2725(3) 0.2665(2) 0.0378(9) Uani 1 1 d . . . 
H10A H 0.5898 1.1948 0.2505 0.045 Uiso 1 1 calc R . . 
H10B H 0.6246 1.3150 0.2912 0.045 Uiso 1 1 calc R . . 
C11 C 0.52928(17) 1.3347(3) 0.19202(19) 0.0356(9) Uani 1 1 d . . . 
H11A H 0.5188 1.4152 0.2077 0.043 Uiso 1 1 calc R . . 
H11B H 0.5669 1.3374 0.1506 0.043 Uiso 1 1 calc R . . 
C12 C 0.45854(17) 1.1694(3) 0.12831(18) 0.0274(8) Uani 1 1 d . . . 
H12A H 0.4818 1.1196 0.1759 0.033 Uiso 1 1 calc R . . 
H12B H 0.4965 1.1654 0.0872 0.033 Uiso 1 1 calc R . . 
 
loop_ 
 _atom_site_aniso_label 
 _atom_site_aniso_U_11 
 _atom_site_aniso_U_22 
 _atom_site_aniso_U_33 
 _atom_site_aniso_U_23 
 _atom_site_aniso_U_13 
 _atom_site_aniso_U_12 
Sn1 0.01552(14) 0.01703(19) 0.02228(16) 0.000 0.00237(11) 0.000 
Br1 0.03082(17) 0.0219(2) 0.03384(19) 0.00735(15) 0.00747(14) -0.00123(15) 
O1 0.0193(10) 0.0292(14) 0.0285(11) -0.0077(10) 0.0080(8) -0.0041(10) 
C1 0.0200(14) 0.0148(17) 0.0198(14) 0.0007(13) -0.0020(12) -0.0035(13) 
C2 0.0189(14) 0.030(2) 0.0247(16) 0.0019(16) 0.0012(12) -0.0050(15) 
O2 0.0354(11) 0.0220(13) 0.0302(12) -0.0004(11) 0.0087(9) -0.0027(11) 
C3 0.0224(15) 0.025(2) 0.0319(17) -0.0076(16) 0.0054(13) -0.0074(15) 
O3 0.0368(12) 0.0443(16) 0.0363(13) -0.0056(12) 0.0094(11) 0.0005(12) 
O4 0.0319(12) 0.0486(17) 0.0358(13) -0.0040(13) 0.0061(10) 0.0051(12) 
C4 0.0199(15) 0.037(2) 0.0359(18) -0.0118(17) 0.0124(13) 0.0012(15) 
O5 0.0272(11) 0.0310(15) 0.0388(13) -0.0091(12) 0.0056(10) -0.0066(11) 
C5 0.0400(18) 0.028(2) 0.044(2) -0.0097(19) 0.0241(16) -0.0096(18) 
C6 0.045(2) 0.034(2) 0.048(2) 0.013(2) 0.0227(17) 0.0021(18) 
C7 0.052(2) 0.056(3) 0.0313(19) 0.0118(19) 0.0128(17) 0.007(2) 
C8 0.047(2) 0.053(3) 0.0272(18) -0.0026(19) -0.0041(16) 0.002(2) 
C9 0.0316(18) 0.054(3) 0.042(2) -0.008(2) -0.0048(16) 0.0021(19) 
C10 0.0263(17) 0.043(3) 0.044(2) -0.0176(19) 0.0057(16) -0.0079(17) 
C11 0.0234(16) 0.041(2) 0.043(2) -0.0139(19) 0.0080(15) -0.0083(17) 
C12 0.0263(15) 0.029(2) 0.0263(17) -0.0018(16) 0.0036(13) -0.0026(16) 
 
_geom_special_details 
; 
 All esds (except the esd in the dihedral angle between two l.s. planes) 
 are estimated using the full covariance matrix.  The cell esds are taken 
 into account individually in the estimation of esds in distances, angles 
 and torsion angles; correlations between esds in cell parameters are only 
 used when they are defined by crystal symmetry.  An approximate (isotropic) 
 treatment of cell esds is used for estimating esds involving l.s. planes. 
; 
 
loop_ 
 _geom_bond_atom_site_label_1 
 _geom_bond_atom_site_label_2 
 _geom_bond_distance 
 _geom_bond_site_symmetry_2 
 _geom_bond_publ_flag 
Sn1 C1 2.136(2) 2 ? 
Sn1 C1 2.136(2) . ? 
Sn1 Br1 2.5552(4) . ? 
Sn1 Br1 2.5552(4) 2 ? 
Sn1 O1 2.5752(19) . ? 
O1 C3 1.438(3) . ? 
O1 C4 1.444(3) . ? 
C1 C2 1.515(4) . ? 
C1 H1A 0.9900 . ? 
C1 H1B 0.9900 . ? 
C2 C3 1.491(4) . ? 
C2 C12 1.531(4) . ? 
C2 H2A 1.0000 . ? 
O2 C6 1.404(4) . ? 
O2 C5 1.424(3) . ? 
C3 H3A 0.9900 . ? 
C3 H3B 0.9900 . ? 
O3 C7 1.399(3) . ? 
O3 C8 1.414(4) . ? 
O4 C10 1.406(4) . ? 
O4 C9 1.424(4) . ? 
C4 C5 1.490(4) . ? 
C4 H4A 0.9900 . ? 
C4 H4B 0.9900 . ? 
O5 C12 1.414(4) . ? 
O5 C11 1.415(3) . ? 
C5 H5A 0.9900 . ? 
C5 H5B 0.9900 . ? 
C6 C7 1.484(5) . ? 
C6 H6A 0.9900 . ? 
C6 H6B 0.9900 . ? 
C7 H7A 0.9900 . ? 
C7 H7B 0.9900 . ? 
C8 C9 1.483(4) . ? 
C8 H8A 0.9900 . ? 
C8 H8B 0.9900 . ? 
C9 H9A 0.9900 . ? 
C9 H9B 0.9900 . ? 
C10 C11 1.485(4) . ? 
C10 H10A 0.9900 . ? 
C10 H10B 0.9900 . ? 
C11 H11A 0.9900 . ? 
C11 H11B 0.9900 . ? 
C12 H12A 0.9900 . ? 
C12 H12B 0.9900 . ? 
 
loop_ 
 _geom_angle_atom_site_label_1 
 _geom_angle_atom_site_label_2 
 _geom_angle_atom_site_label_3 
 _geom_angle 
 _geom_angle_site_symmetry_1 
 _geom_angle_site_symmetry_3 
 _geom_angle_publ_flag 
C1 Sn1 C1 141.74(16) 2 . ? 
C1 Sn1 Br1 98.26(8) 2 . ? 
C1 Sn1 Br1 107.97(8) . . ? 
C1 Sn1 Br1 107.97(8) 2 2 ? 
C1 Sn1 Br1 98.26(8) . 2 ? 
Br1 Sn1 Br1 92.77(2) . 2 ? 
C1 Sn1 O1 82.90(9) 2 . ? 
C1 Sn1 O1 72.79(9) . . ? 
Br1 Sn1 O1 84.33(5) . . ? 
Br1 Sn1 O1 169.08(4) 2 . ? 
C3 O1 C4 114.1(2) . . ? 
C3 O1 Sn1 108.37(15) . . ? 
C4 O1 Sn1 134.19(17) . . ? 
C2 C1 Sn1 111.45(17) . . ? 
C2 C1 H1A 109.3 . . ? 
Sn1 C1 H1A 109.3 . . ? 
C2 C1 H1B 109.3 . . ? 
Sn1 C1 H1B 109.3 . . ? 
H1A C1 H1B 108.0 . . ? 
C3 C2 C1 111.9(3) . . ? 
C3 C2 C12 108.6(2) . . ? 
C1 C2 C12 110.6(2) . . ? 
C3 C2 H2A 108.6 . . ? 
C1 C2 H2A 108.6 . . ? 
C12 C2 H2A 108.6 . . ? 
C6 O2 C5 113.5(2) . . ? 
O1 C3 C2 107.8(2) . . ? 
O1 C3 H3A 110.2 . . ? 
C2 C3 H3A 110.2 . . ? 
O1 C3 H3B 110.2 . . ? 
C2 C3 H3B 110.2 . . ? 
H3A C3 H3B 108.5 . . ? 
C7 O3 C8 113.0(3) . . ? 
C10 O4 C9 113.8(2) . . ? 
O1 C4 C5 114.3(2) . . ? 
O1 C4 H4A 108.7 . . ? 
C5 C4 H4A 108.7 . . ? 
O1 C4 H4B 108.7 . . ? 
C5 C4 H4B 108.7 . . ? 
H4A C4 H4B 107.6 . . ? 
C12 O5 C11 114.2(2) . . ? 
O2 C5 C4 110.3(3) . . ? 
O2 C5 H5A 109.6 . . ? 
C4 C5 H5A 109.6 . . ? 
O2 C5 H5B 109.6 . . ? 
C4 C5 H5B 109.6 . . ? 
H5A C5 H5B 108.1 . . ? 
O2 C6 C7 109.3(3) . . ? 
O2 C6 H6A 109.8 . . ? 
C7 C6 H6A 109.8 . . ? 
O2 C6 H6B 109.8 . . ? 
C7 C6 H6B 109.8 . . ? 
H6A C6 H6B 108.3 . . ? 
O3 C7 C6 109.6(3) . . ? 
O3 C7 H7A 109.7 . . ? 
C6 C7 H7A 109.7 . . ? 
O3 C7 H7B 109.7 . . ? 
C6 C7 H7B 109.7 . . ? 
H7A C7 H7B 108.2 . . ? 
O3 C8 C9 109.0(3) . . ? 
O3 C8 H8A 109.9 . . ? 
C9 C8 H8A 109.9 . . ? 
O3 C8 H8B 109.9 . . ? 
C9 C8 H8B 109.9 . . ? 
H8A C8 H8B 108.3 . . ? 
O4 C9 C8 109.4(3) . . ? 
O4 C9 H9A 109.8 . . ? 
C8 C9 H9A 109.8 . . ? 
O4 C9 H9B 109.8 . . ? 
C8 C9 H9B 109.8 . . ? 
H9A C9 H9B 108.2 . . ? 
O4 C10 C11 110.2(2) . . ? 
O4 C10 H10A 109.6 . . ? 
C11 C10 H10A 109.6 . . ? 
O4 C10 H10B 109.6 . . ? 
C11 C10 H10B 109.6 . . ? 
H10A C10 H10B 108.1 . . ? 
O5 C11 C10 114.1(3) . . ? 
O5 C11 H11A 108.7 . . ? 
C10 C11 H11A 108.7 . . ? 
O5 C11 H11B 108.7 . . ? 
C10 C11 H11B 108.7 . . ? 
H11A C11 H11B 107.6 . . ? 
O5 C12 C2 107.4(2) . . ? 
O5 C12 H12A 110.2 . . ? 
C2 C12 H12A 110.2 . . ? 
O5 C12 H12B 110.2 . . ? 
C2 C12 H12B 110.2 . . ? 
H12A C12 H12B 108.5 . . ? 
 
loop_ 
 _geom_torsion_atom_site_label_1 
 _geom_torsion_atom_site_label_2 
 _geom_torsion_atom_site_label_3 
 _geom_torsion_atom_site_label_4 
 _geom_torsion 
 _geom_torsion_site_symmetry_1 
 _geom_torsion_site_symmetry_2 
 _geom_torsion_site_symmetry_3 
 _geom_torsion_site_symmetry_4 
 _geom_torsion_publ_flag 
C1 Sn1 O1 C3 -150.95(19) 2 . . . ? 
C1 Sn1 O1 C3 -0.84(18) . . . . ? 
Br1 Sn1 O1 C3 109.96(17) . . . . ? 
Br1 Sn1 O1 C3 34.9(4) 2 . . . ? 
C1 Sn1 O1 C4 51.7(2) 2 . . . ? 
C1 Sn1 O1 C4 -158.2(3) . . . . ? 
Br1 Sn1 O1 C4 -47.4(2) . . . . ? 
Br1 Sn1 O1 C4 -122.5(3) 2 . . . ? 
C1 Sn1 C1 C2 25.53(17) 2 . . . ? 
Br1 Sn1 C1 C2 -105.39(19) . . . . ? 
Br1 Sn1 C1 C2 158.96(18) 2 . . . ? 
O1 Sn1 C1 C2 -27.46(18) . . . . ? 
Sn1 C1 C2 C3 57.4(3) . . . . ? 
Sn1 C1 C2 C12 178.67(19) . . . . ? 
C4 O1 C3 C2 -168.9(3) . . . . ? 
Sn1 O1 C3 C2 28.7(3) . . . . ? 
C1 C2 C3 O1 -56.3(3) . . . . ? 
C12 C2 C3 O1 -178.7(2) . . . . ? 
C3 O1 C4 C5 -65.3(3) . . . . ? 
Sn1 O1 C4 C5 91.1(3) . . . . ? 
C6 O2 C5 C4 -167.3(2) . . . . ? 
O1 C4 C5 O2 76.5(3) . . . . ? 
C5 O2 C6 C7 177.8(2) . . . . ? 
C8 O3 C7 C6 176.4(3) . . . . ? 
O2 C6 C7 O3 -65.5(4) . . . . ? 
C7 O3 C8 C9 -174.4(3) . . . . ? 
C10 O4 C9 C8 -170.7(3) . . . . ? 
O3 C8 C9 O4 71.8(4) . . . . ? 
C9 O4 C10 C11 165.2(3) . . . . ? 
C12 O5 C11 C10 -59.5(3) . . . . ? 
O4 C10 C11 O5 -55.6(4) . . . . ? 
C11 O5 C12 C2 -179.5(2) . . . . ? 
C3 C2 C12 O5 -61.8(3) . . . . ? 
C1 C2 C12 O5 175.0(2) . . . . ? 
 
_diffrn_measured_fraction_theta_max    0.999 
_diffrn_reflns_theta_full              25.50 
_diffrn_measured_fraction_theta_full   0.999 
_refine_diff_density_max    0.595 
_refine_diff_density_min   -0.428 
_refine_diff_density_rms    0.075 

#===END
 
data_compound5_1128ia 
 
_audit_creation_method            SHELXL-97 
_chemical_name_systematic 
; 
dichlorido-bis(1,4,7,10,13-pentaoxacyclohexadec-15-ylmethyl)-stannane 
; 
_chemical_name_common             ? 
_chemical_melting_point           409
_chemical_formula_moiety          'C24 H46 Cl2 O10 Sn'  
_chemical_formula_sum 
 'C24 H46 Cl2 O10 Sn' 
_chemical_formula_weight          684.20 
 
loop_ 
 _atom_type_symbol 
 _atom_type_description 
 _atom_type_scat_dispersion_real 
 _atom_type_scat_dispersion_imag 
 _atom_type_scat_source 
 'C'  'C'   0.0033   0.0016 
 'International Tables Vol C Tables 4.2.6.8 and 6.1.1.4' 
 'H'  'H'   0.0000   0.0000 
 'International Tables Vol C Tables 4.2.6.8 and 6.1.1.4' 
 'O'  'O'   0.0106   0.0060 
 'International Tables Vol C Tables 4.2.6.8 and 6.1.1.4' 
 'Cl'  'Cl'   0.1484   0.1585 
 'International Tables Vol C Tables 4.2.6.8 and 6.1.1.4' 
 'Sn'  'Sn'  -0.6537   1.4246 
 'International Tables Vol C Tables 4.2.6.8 and 6.1.1.4' 
 
_symmetry_cell_setting            monoclinic 
_symmetry_space_group_name_H-M    'I 2/a'  
_symmetry_space_group_name_Hall   '-I 2ya' 
 
loop_ 
 _symmetry_equiv_pos_as_xyz 
 'x, y, z' 
 '-x+1/2, y, -z' 
 'x+1/2, y+1/2, z+1/2' 
 '-x+1, y+1/2, -z+1/2' 
 '-x, -y, -z' 
 'x-1/2, -y, z' 
 '-x+1/2, -y+1/2, -z+1/2' 
 'x, -y+1/2, z+1/2' 
 
_cell_length_a                    15.948(4) 
_cell_length_b                    11.4212(6) 
_cell_length_c                    16.389(2) 
_cell_angle_alpha                 90.00 
_cell_angle_beta                  100.19(2) 
_cell_angle_gamma                 90.00 
_cell_volume                      2938.1(8) 
_cell_formula_units_Z             4 
_cell_measurement_temperature     173(2) 
_cell_measurement_reflns_used     4734
_cell_measurement_theta_min       2.1805
_cell_measurement_theta_max       29.1022 
 
_exptl_crystal_description        plate 
_exptl_crystal_colour             colourless 
_exptl_crystal_size_max           0.17 
_exptl_crystal_size_mid           0.12 
_exptl_crystal_size_min           0.04 
_exptl_crystal_density_meas       ? 
_exptl_crystal_density_diffrn     1.547 
_exptl_crystal_density_method     'not measured' 
_exptl_crystal_F_000              1416 
_exptl_absorpt_coefficient_mu     1.102 
_exptl_absorpt_correction_type    'multi-scan' 
_exptl_absorpt_correction_T_min   0.98409
_exptl_absorpt_correction_T_max   1.00000 
_exptl_absorpt_process_details
;
CrysAlisPro, Oxford Diffraction Ltd.,
Version 1.171.33.55 (release 05-01-2010 CrysAlis171 .NET)
(compiled Jan  5 2010,16:28:46)
Empirical absorption correction using spherical harmonics,
 implemented in SCALE3 ABSPACK scaling algorithm.
;  
 
_diffrn_ambient_temperature       173(2) 
_diffrn_radiation_wavelength      0.71073 
_diffrn_radiation_type            MoK\a 
_diffrn_radiation_source          'fine-focus sealed tube'
_diffrn_measurement_device        'Xcalibur2 CCD Diffractometer'  
_diffrn_radiation_monochromator   graphite 
_diffrn_measurement_device_type   ? 
_diffrn_measurement_method        '\w und \y scan' 
_diffrn_detector_area_resol_mean  ? 
_diffrn_standards_number          ? 
_diffrn_standards_interval_count  ? 
_diffrn_standards_interval_time   ? 
_diffrn_standards_decay_%         ? 
_diffrn_reflns_number             12808 
_diffrn_reflns_av_R_equivalents   0.0502 
_diffrn_reflns_av_sigmaI/netI     0.0674 
_diffrn_reflns_limit_h_min        -19 
_diffrn_reflns_limit_h_max        19 
_diffrn_reflns_limit_k_min        -13 
_diffrn_reflns_limit_k_max        13 
_diffrn_reflns_limit_l_min        -19 
_diffrn_reflns_limit_l_max        19 
_diffrn_reflns_theta_min          2.18 
_diffrn_reflns_theta_max          25.50 
_reflns_number_total              2745 
_reflns_number_gt                 2094 
_reflns_threshold_expression      >2sigma(I) 
 
_computing_data_collection        
;CrysAlisPro, Oxford Diffraction Ltd., Version 1.171.33.55'
;  
_computing_cell_refinement        
;CrysAlisPro, Oxford Diffraction Ltd., Version 1.171.33.55'
;
_computing_data_reduction         
;CrysAlisPro, Oxford Diffraction Ltd., Version 1.171.33.55'
;
_computing_structure_solution     'SHELXS-97 (Sheldrick, 1990)' 
_computing_structure_refinement   'SHELXL-97 (Sheldrick, 1997)' 
_computing_molecular_graphics     'SHELXP-97 (Sheldrick, 1997)' 
_computing_publication_material   'enCIFer Version 1.4'  
 
_refine_special_details 
; 
 Refinement of F^2^ against ALL reflections.  The weighted R-factor wR and 
 goodness of fit S are based on F^2^, conventional R-factors R are based 
 on F, with F set to zero for negative F^2^. The threshold expression of 
 F^2^ > 2sigma(F^2^) is used only for calculating R-factors(gt) etc. and is 
 not relevant to the choice of reflections for refinement.  R-factors based 
 on F^2^ are statistically about twice as large as those based on F, and R- 
 factors based on ALL data will be even larger. 
; 
 
_refine_ls_structure_factor_coef  Fsqd  
_refine_ls_matrix_type            full 
_refine_ls_weighting_scheme       calc  
_refine_ls_weighting_details 
 'calc w=1/[\s^2^(Fo^2^)+(0.0107P)^2^+0.0000P] where P=(Fo^2^+2Fc^2^)/3' 
_atom_sites_solution_primary      direct 
_atom_sites_solution_secondary    difmap 
_atom_sites_solution_hydrogens    geom 
_refine_ls_hydrogen_treatment     constr
_refine_ls_extinction_method      none 
_refine_ls_extinction_coef        ? 
_refine_ls_number_reflns          2745 
_refine_ls_number_parameters      168 
_refine_ls_number_restraints      0 
_refine_ls_R_factor_all           0.0376 
_refine_ls_R_factor_gt            0.0238 
_refine_ls_wR_factor_ref          0.0360 
_refine_ls_wR_factor_gt           0.0352 
_refine_ls_goodness_of_fit_ref    0.810 
_refine_ls_restrained_S_all       0.810 
_refine_ls_shift/su_max           0.000 
_refine_ls_shift/su_mean          0.000 
 
loop_ 
 _atom_site_label 
 _atom_site_type_symbol 
 _atom_site_fract_x 
 _atom_site_fract_y 
 _atom_site_fract_z 
 _atom_site_U_iso_or_equiv 
 _atom_site_adp_type 
 _atom_site_occupancy 
 _atom_site_symmetry_multiplicity 
 _atom_site_calc_flag 
 _atom_site_refinement_flags 
 _atom_site_disorder_assembly 
 _atom_site_disorder_group 
Sn1 Sn 0.2500 0.05384(2) 0.5000 0.01918(7) Uani 1 2 d S . . 
Cl1 Cl 0.28970(4) 0.19891(5) 0.40735(4) 0.02929(16) Uani 1 1 d . . . 
O1 O 0.26615(9) -0.09053(12) 0.38432(9) 0.0240(4) Uani 1 1 d . . . 
C1 C 0.12616(13) -0.00546(17) 0.44841(13) 0.0204(6) Uani 1 1 d . . . 
H1A H 0.0906 -0.0064 0.4922 0.025 Uiso 1 1 calc R . . 
H1B H 0.1000 0.0500 0.4049 0.025 Uiso 1 1 calc R . . 
O2 O 0.25426(10) -0.09363(12) 0.19667(9) 0.0275(4) Uani 1 1 d . . . 
C2 C 0.12694(14) -0.12771(18) 0.41091(13) 0.0208(6) Uani 1 1 d . . . 
H2A H 0.1500 -0.1840 0.4561 0.025 Uiso 1 1 calc R . . 
O3 O 0.08652(11) -0.09654(13) 0.10820(9) 0.0340(4) Uani 1 1 d . . . 
C3 C 0.18301(14) -0.13100(18) 0.34646(14) 0.0228(6) Uani 1 1 d . . . 
H3A H 0.1866 -0.2119 0.3256 0.027 Uiso 1 1 calc R . . 
H3B H 0.1593 -0.0800 0.2991 0.027 Uiso 1 1 calc R . . 
O4 O -0.02215(10) -0.26057(13) 0.17311(10) 0.0327(4) Uani 1 1 d . . . 
C4 C 0.33122(14) -0.1096(2) 0.33486(14) 0.0293(6) Uani 1 1 d . . . 
H4A H 0.3327 -0.1940 0.3212 0.035 Uiso 1 1 calc R . . 
H4B H 0.3872 -0.0887 0.3682 0.035 Uiso 1 1 calc R . . 
O5 O 0.04426(9) -0.28367(12) 0.34444(9) 0.0263(4) Uani 1 1 d . . . 
C5 C 0.31826(14) -0.0406(2) 0.25594(13) 0.0305(6) Uani 1 1 d . . . 
H5A H 0.3013 0.0404 0.2668 0.037 Uiso 1 1 calc R . . 
H5B H 0.3723 -0.0372 0.2341 0.037 Uiso 1 1 calc R . . 
C6 C 0.22722(16) -0.02203(19) 0.12724(15) 0.0368(7) Uani 1 1 d . . . 
H6A H 0.2756 -0.0054 0.0987 0.044 Uiso 1 1 calc R . . 
H6B H 0.2055 0.0533 0.1450 0.044 Uiso 1 1 calc R . . 
C7 C 0.15822(16) -0.0841(2) 0.06969(14) 0.0381(7) Uani 1 1 d . . . 
H7A H 0.1427 -0.0387 0.0177 0.046 Uiso 1 1 calc R . . 
H7B H 0.1786 -0.1622 0.0556 0.046 Uiso 1 1 calc R . . 
C8 C 0.02021(16) -0.1609(2) 0.06036(15) 0.0378(7) Uani 1 1 d . . . 
H8A H 0.0420 -0.2377 0.0454 0.045 Uiso 1 1 calc R . . 
H8B H -0.0018 -0.1181 0.0085 0.045 Uiso 1 1 calc R . . 
C9 C -0.04944(16) -0.1788(2) 0.10844(15) 0.0346(7) Uani 1 1 d . . . 
H9A H -0.0641 -0.1034 0.1322 0.042 Uiso 1 1 calc R . . 
H9B H -0.1009 -0.2087 0.0715 0.042 Uiso 1 1 calc R . . 
C10 C -0.07766(15) -0.2681(2) 0.23096(15) 0.0325(7) Uani 1 1 d . . . 
H10A H -0.1304 -0.3096 0.2057 0.039 Uiso 1 1 calc R . . 
H10B H -0.0935 -0.1884 0.2466 0.039 Uiso 1 1 calc R . . 
C11 C -0.03521(15) -0.3325(2) 0.30637(14) 0.0314(6) Uani 1 1 d . . . 
H11A H -0.0739 -0.3334 0.3474 0.038 Uiso 1 1 calc R . . 
H11B H -0.0259 -0.4146 0.2909 0.038 Uiso 1 1 calc R . . 
C12 C 0.03823(14) -0.16655(18) 0.37197(14) 0.0231(6) Uani 1 1 d . . . 
H12A H -0.0003 -0.1625 0.4131 0.028 Uiso 1 1 calc R . . 
H12B H 0.0153 -0.1152 0.3246 0.028 Uiso 1 1 calc R . . 
 
loop_ 
 _atom_site_aniso_label 
 _atom_site_aniso_U_11 
 _atom_site_aniso_U_22 
 _atom_site_aniso_U_33 
 _atom_site_aniso_U_23 
 _atom_site_aniso_U_13 
 _atom_site_aniso_U_12 
Sn1 0.01744(13) 0.01699(12) 0.02216(14) 0.000 0.00087(10) 0.000 
Cl1 0.0310(4) 0.0225(3) 0.0336(4) 0.0086(3) 0.0037(3) -0.0021(3) 
O1 0.0191(9) 0.0281(10) 0.0255(9) -0.0062(7) 0.0058(7) -0.0056(7) 
C1 0.0186(14) 0.0221(12) 0.0202(14) -0.0004(11) 0.0022(11) -0.0009(10) 
O2 0.0359(11) 0.0204(9) 0.0270(10) -0.0001(8) 0.0072(8) -0.0029(7) 
C2 0.0220(14) 0.0199(13) 0.0194(13) 0.0002(11) 0.0003(11) -0.0033(11) 
O3 0.0321(11) 0.0375(11) 0.0338(10) -0.0062(8) 0.0096(9) -0.0019(8) 
C3 0.0221(14) 0.0218(13) 0.0243(14) -0.0043(11) 0.0035(11) -0.0038(11) 
O4 0.0307(11) 0.0370(10) 0.0307(11) -0.0019(9) 0.0063(9) 0.0048(8) 
C4 0.0189(14) 0.0337(14) 0.0360(16) -0.0107(13) 0.0072(12) -0.0029(11) 
O5 0.0229(10) 0.0219(9) 0.0335(10) -0.0066(8) 0.0029(8) -0.0064(7) 
C5 0.0313(15) 0.0279(14) 0.0367(15) -0.0097(13) 0.0183(12) -0.0102(13) 
C6 0.0405(17) 0.0334(16) 0.0412(17) 0.0103(13) 0.0204(14) 0.0021(12) 
C7 0.0435(18) 0.0464(18) 0.0262(15) 0.0118(13) 0.0107(13) 0.0028(13) 
C8 0.0415(18) 0.0409(16) 0.0283(16) -0.0030(13) -0.0013(14) 0.0010(14) 
C9 0.0309(17) 0.0356(15) 0.0333(17) -0.0049(13) -0.0054(13) 0.0007(13) 
C10 0.0214(15) 0.0380(15) 0.0362(17) -0.0165(13) -0.0003(13) -0.0048(12) 
C11 0.0255(16) 0.0318(14) 0.0390(17) -0.0128(13) 0.0112(13) -0.0092(12) 
C12 0.0270(15) 0.0218(13) 0.0205(14) -0.0004(11) 0.0041(11) -0.0023(11) 
 
_geom_special_details 
; 
 All esds (except the esd in the dihedral angle between two l.s. planes) 
 are estimated using the full covariance matrix.  The cell esds are taken 
 into account individually in the estimation of esds in distances, angles 
 and torsion angles; correlations between esds in cell parameters are only 
 used when they are defined by crystal symmetry.  An approximate (isotropic) 
 treatment of cell esds is used for estimating esds involving l.s. planes. 
; 
 
loop_ 
 _geom_bond_atom_site_label_1 
 _geom_bond_atom_site_label_2 
 _geom_bond_distance 
 _geom_bond_site_symmetry_2 
 _geom_bond_publ_flag 
Sn1 C1 2.117(2) . ? 
Sn1 C1 2.117(2) 2_556 ? 
Sn1 Cl1 2.4067(6) . ? 
Sn1 Cl1 2.4067(6) 2_556 ? 
O1 C3 1.437(2) . ? 
O1 C4 1.442(3) . ? 
C1 C2 1.526(3) . ? 
C1 H1A 0.9900 . ? 
C1 H1B 0.9900 . ? 
O2 C6 1.406(2) . ? 
O2 C5 1.414(2) . ? 
C2 C3 1.500(3) . ? 
C2 C12 1.512(3) . ? 
C2 H2A 1.0000 . ? 
O3 C7 1.408(3) . ? 
O3 C8 1.407(3) . ? 
C3 H3A 0.9900 . ? 
C3 H3B 0.9900 . ? 
O4 C10 1.410(3) . ? 
O4 C9 1.422(3) . ? 
C4 C5 1.497(3) . ? 
C4 H4A 0.9900 . ? 
C4 H4B 0.9900 . ? 
O5 C12 1.420(2) . ? 
O5 C11 1.423(2) . ? 
C5 H5A 0.9900 . ? 
C5 H5B 0.9900 . ? 
C6 C7 1.495(3) . ? 
C6 H6A 0.9900 . ? 
C6 H6B 0.9900 . ? 
C7 H7A 0.9900 . ? 
C7 H7B 0.9900 . ? 
C8 C9 1.485(3) . ? 
C8 H8A 0.9900 . ? 
C8 H8B 0.9900 . ? 
C9 H9A 0.9900 . ? 
C9 H9B 0.9900 . ? 
C10 C11 1.493(3) . ? 
C10 H10A 0.9900 . ? 
C10 H10B 0.9900 . ? 
C11 H11A 0.9900 . ? 
C11 H11B 0.9900 . ? 
C12 H12A 0.9900 . ? 
C12 H12B 0.9900 . ? 
 
loop_ 
 _geom_angle_atom_site_label_1 
 _geom_angle_atom_site_label_2 
 _geom_angle_atom_site_label_3 
 _geom_angle 
 _geom_angle_site_symmetry_1 
 _geom_angle_site_symmetry_3 
 _geom_angle_publ_flag 
C1 Sn1 C1 142.69(11) . 2_556 ? 
C1 Sn1 Cl1 107.41(6) . . ? 
C1 Sn1 Cl1 98.12(6) 2_556 . ? 
C1 Sn1 Cl1 98.12(6) . 2_556 ? 
C1 Sn1 Cl1 107.41(6) 2_556 2_556 ? 
Cl1 Sn1 Cl1 92.99(3) . 2_556 ? 
C3 O1 C4 114.17(16) . . ? 
C2 C1 Sn1 112.33(14) . . ? 
C2 C1 H1A 109.1 . . ? 
Sn1 C1 H1A 109.1 . . ? 
C2 C1 H1B 109.1 . . ? 
Sn1 C1 H1B 109.1 . . ? 
H1A C1 H1B 107.9 . . ? 
C6 O2 C5 112.82(16) . . ? 
C3 C2 C12 108.98(18) . . ? 
C3 C2 C1 110.78(18) . . ? 
C12 C2 C1 111.39(18) . . ? 
C3 C2 H2A 108.5 . . ? 
C12 C2 H2A 108.5 . . ? 
C1 C2 H2A 108.5 . . ? 
C7 O3 C8 113.15(18) . . ? 
O1 C3 C2 107.89(17) . . ? 
O1 C3 H3A 110.1 . . ? 
C2 C3 H3A 110.1 . . ? 
O1 C3 H3B 110.1 . . ? 
C2 C3 H3B 110.1 . . ? 
H3A C3 H3B 108.4 . . ? 
C10 O4 C9 113.30(18) . . ? 
O1 C4 C5 113.76(19) . . ? 
O1 C4 H4A 108.8 . . ? 
C5 C4 H4A 108.8 . . ? 
O1 C4 H4B 108.8 . . ? 
C5 C4 H4B 108.8 . . ? 
H4A C4 H4B 107.7 . . ? 
C12 O5 C11 113.76(16) . . ? 
O2 C5 C4 109.91(18) . . ? 
O2 C5 H5A 109.7 . . ? 
C4 C5 H5A 109.7 . . ? 
O2 C5 H5B 109.7 . . ? 
C4 C5 H5B 109.7 . . ? 
H5A C5 H5B 108.2 . . ? 
O2 C6 C7 108.73(18) . . ? 
O2 C6 H6A 109.9 . . ? 
C7 C6 H6A 109.9 . . ? 
O2 C6 H6B 109.9 . . ? 
C7 C6 H6B 109.9 . . ? 
H6A C6 H6B 108.3 . . ? 
O3 C7 C6 109.3(2) . . ? 
O3 C7 H7A 109.8 . . ? 
C6 C7 H7A 109.8 . . ? 
O3 C7 H7B 109.8 . . ? 
C6 C7 H7B 109.8 . . ? 
H7A C7 H7B 108.3 . . ? 
O3 C8 C9 109.6(2) . . ? 
O3 C8 H8A 109.8 . . ? 
C9 C8 H8A 109.8 . . ? 
O3 C8 H8B 109.8 . . ? 
C9 C8 H8B 109.8 . . ? 
H8A C8 H8B 108.2 . . ? 
O4 C9 C8 109.1(2) . . ? 
O4 C9 H9A 109.9 . . ? 
C8 C9 H9A 109.9 . . ? 
O4 C9 H9B 109.9 . . ? 
C8 C9 H9B 109.9 . . ? 
H9A C9 H9B 108.3 . . ? 
O4 C10 C11 109.9(2) . . ? 
O4 C10 H10A 109.7 . . ? 
C11 C10 H10A 109.7 . . ? 
O4 C10 H10B 109.7 . . ? 
C11 C10 H10B 109.7 . . ? 
H10A C10 H10B 108.2 . . ? 
O5 C11 C10 114.09(19) . . ? 
O5 C11 H11A 108.7 . . ? 
C10 C11 H11A 108.7 . . ? 
O5 C11 H11B 108.7 . . ? 
C10 C11 H11B 108.7 . . ? 
H11A C11 H11B 107.6 . . ? 
O5 C12 C2 107.43(18) . . ? 
O5 C12 H12A 110.2 . . ? 
C2 C12 H12A 110.2 . . ? 
O5 C12 H12B 110.2 . . ? 
C2 C12 H12B 110.2 . . ? 
H12A C12 H12B 108.5 . . ? 
 
loop_ 
 _geom_torsion_atom_site_label_1 
 _geom_torsion_atom_site_label_2 
 _geom_torsion_atom_site_label_3 
 _geom_torsion_atom_site_label_4 
 _geom_torsion 
 _geom_torsion_site_symmetry_1 
 _geom_torsion_site_symmetry_2 
 _geom_torsion_site_symmetry_3 
 _geom_torsion_site_symmetry_4 
 _geom_torsion_publ_flag 
C1 Sn1 C1 C2 -25.18(13) 2_556 . . . ? 
Cl1 Sn1 C1 C2 105.79(14) . . . . ? 
Cl1 Sn1 C1 C2 -158.48(14) 2_556 . . . ? 
Sn1 C1 C2 C3 -56.6(2) . . . . ? 
Sn1 C1 C2 C12 -178.11(15) . . . . ? 
C4 O1 C3 C2 168.78(17) . . . . ? 
C12 C2 C3 O1 178.35(16) . . . . ? 
C1 C2 C3 O1 55.5(2) . . . . ? 
C3 O1 C4 C5 65.6(2) . . . . ? 
C6 O2 C5 C4 168.43(19) . . . . ? 
O1 C4 C5 O2 -77.2(2) . . . . ? 
C5 O2 C6 C7 -178.43(19) . . . . ? 
C8 O3 C7 C6 -176.13(18) . . . . ? 
O2 C6 C7 O3 65.5(2) . . . . ? 
C7 O3 C8 C9 175.04(19) . . . . ? 
C10 O4 C9 C8 169.53(19) . . . . ? 
O3 C8 C9 O4 -71.5(2) . . . . ? 
C9 O4 C10 C11 -166.51(17) . . . . ? 
C12 O5 C11 C10 60.5(3) . . . . ? 
O4 C10 C11 O5 55.7(3) . . . . ? 
C11 O5 C12 C2 179.77(19) . . . . ? 
C3 C2 C12 O5 61.8(2) . . . . ? 
C1 C2 C12 O5 -175.72(17) . . . . ? 
 
_diffrn_measured_fraction_theta_max    1.000 
_diffrn_reflns_theta_full              25.50 
_diffrn_measured_fraction_theta_full   1.000 
_refine_diff_density_max    0.662 
_refine_diff_density_min   -0.292 
_refine_diff_density_rms    0.061 

#===END
 
data_compound6_1049i 
 
_audit_creation_method            SHELXL-97 
_chemical_name_systematic 
; 
difluorido-bis(1,4,7,10,13-pentaoxacyclohexadec-15-ylmethyl)-stannane 
; 
_chemical_name_common             ? 
_chemical_melting_point           383 
_chemical_formula_moiety          'C24 H46 F2 O10 Sn' 
_chemical_formula_sum 
 'C24 H46 F2 O10 Sn' 
_chemical_formula_weight          651.30 
 
loop_ 
 _atom_type_symbol 
 _atom_type_description 
 _atom_type_scat_dispersion_real 
 _atom_type_scat_dispersion_imag 
 _atom_type_scat_source 
 'C'  'C'   0.0033   0.0016 
 'International Tables Vol C Tables 4.2.6.8 and 6.1.1.4' 
 'H'  'H'   0.0000   0.0000 
 'International Tables Vol C Tables 4.2.6.8 and 6.1.1.4' 
 'O'  'O'   0.0106   0.0060 
 'International Tables Vol C Tables 4.2.6.8 and 6.1.1.4' 
 'F'  'F'   0.0171   0.0103 
 'International Tables Vol C Tables 4.2.6.8 and 6.1.1.4' 
 'Sn'  'Sn'  -0.6537   1.4246 
 'International Tables Vol C Tables 4.2.6.8 and 6.1.1.4' 
 
_symmetry_cell_setting            monoclinic 
_symmetry_space_group_name_H-M    'I 2/a'
_symmetry_space_group_name_Hall   '-I 2ya' 
 
loop_ 
 _symmetry_equiv_pos_as_xyz 
 'x, y, z' 
 '-x+1/2, y, -z' 
 'x+1/2, y+1/2, z+1/2' 
 '-x+1, y+1/2, -z+1/2' 
 '-x, -y, -z' 
 'x-1/2, -y, z' 
 '-x+1/2, -y+1/2, -z+1/2' 
 'x, -y+1/2, z+1/2' 
 
_cell_length_a                    14.586(6) 
_cell_length_b                    12.2579(13) 
_cell_length_c                    16.169(4) 
_cell_angle_alpha                 90.00 
_cell_angle_beta                  102.09(4) 
_cell_angle_gamma                 90.00 
_cell_volume                      2826.7(14) 
_cell_formula_units_Z             4 
_cell_measurement_temperature     173(2) 
_cell_measurement_reflns_used     2577
_cell_measurement_theta_min       2.1863
_cell_measurement_theta_max       29.2163 
 
_exptl_crystal_description        column 
_exptl_crystal_colour             colourless 
_exptl_crystal_size_max           0.18 
_exptl_crystal_size_mid           0.05 
_exptl_crystal_size_min           0.04 
_exptl_crystal_density_meas       ? 
_exptl_crystal_density_diffrn     1.530 
_exptl_crystal_density_method     'not measured' 
_exptl_crystal_F_000              1352 
_exptl_absorpt_coefficient_mu     0.968 
_exptl_absorpt_correction_type    'multi-scan'
_exptl_absorpt_correction_T_min   0.88772
_exptl_absorpt_correction_T_max   1.00000 
_exptl_absorpt_process_details
;
CrysAlisPro, Oxford Diffraction Ltd.,
Version 1.171.33.55 (release 05-01-2010 CrysAlis171 .NET)
(compiled Jan  5 2010,16:28:46)
Empirical absorption correction using spherical harmonics,
 implemented in SCALE3 ABSPACK scaling algorithm.
; 
 
_diffrn_ambient_temperature       173(2) 
_diffrn_radiation_wavelength      0.71073 
_diffrn_radiation_type            MoK\a 
_diffrn_radiation_source          'fine-focus sealed tube'
_diffrn_measurement_device        'Xcalibur2 CCD Diffractometer'  
_diffrn_radiation_monochromator   graphite 
_diffrn_measurement_device_type   ? 
_diffrn_measurement_method        '\w und \y scan' 
_diffrn_detector_area_resol_mean  ? 
_diffrn_standards_number          ? 
_diffrn_standards_interval_count  ? 
_diffrn_standards_interval_time   ? 
_diffrn_standards_decay_%         ? 
_diffrn_reflns_number             7918 
_diffrn_reflns_av_R_equivalents   0.0467 
_diffrn_reflns_av_sigmaI/netI     0.1075 
_diffrn_reflns_limit_h_min        -17 
_diffrn_reflns_limit_h_max        17 
_diffrn_reflns_limit_k_min        -13 
_diffrn_reflns_limit_k_max        14 
_diffrn_reflns_limit_l_min        -19 
_diffrn_reflns_limit_l_max        19 
_diffrn_reflns_theta_min          2.19 
_diffrn_reflns_theta_max          25.49 
_reflns_number_total              2629 
_reflns_number_gt                 1888 
_reflns_threshold_expression      >2sigma(I) 
 
_computing_data_collection        
;CrysAlisPro, Oxford Diffraction Ltd., Version 1.171.33.55'
;  
_computing_cell_refinement        
;CrysAlisPro, Oxford Diffraction Ltd., Version 1.171.33.55'
;
_computing_data_reduction         
;CrysAlisPro, Oxford Diffraction Ltd., Version 1.171.33.55'
;
_computing_structure_solution     'SHELXS-97 (Sheldrick, 1990)' 
_computing_structure_refinement   'SHELXL-97 (Sheldrick, 1997)' 
_computing_molecular_graphics     'SHELXP-97 (Sheldrick, 1997)' 
_computing_publication_material   'enCIFer Version 1.4' 
 
_refine_special_details 
; 
 Refinement of F^2^ against ALL reflections.  The weighted R-factor wR and 
 goodness of fit S are based on F^2^, conventional R-factors R are based 
 on F, with F set to zero for negative F^2^. The threshold expression of 
 F^2^ > 2sigma(F^2^) is used only for calculating R-factors(gt) etc. and is 
 not relevant to the choice of reflections for refinement.  R-factors based 
 on F^2^ are statistically about twice as large as those based on F, and R- 
 factors based on ALL data will be even larger. 
; 
 
_refine_ls_structure_factor_coef  Fsqd  
_refine_ls_matrix_type            full 
_refine_ls_weighting_scheme       calc  
_refine_ls_weighting_details 
 'calc w=1/[\s^2^(Fo^2^)+(0.0009P)^2^+0.0000P] where P=(Fo^2^+2Fc^2^)/3' 
_atom_sites_solution_primary      direct 
_atom_sites_solution_secondary    difmap 
_atom_sites_solution_hydrogens    geom 
_refine_ls_hydrogen_treatment     constr
_refine_ls_extinction_method      none 
_refine_ls_extinction_coef        ? 
_refine_ls_number_reflns          2629 
_refine_ls_number_parameters      168 
_refine_ls_number_restraints      0 
_refine_ls_R_factor_all           0.0546 
_refine_ls_R_factor_gt            0.0329 
_refine_ls_wR_factor_ref          0.0305 
_refine_ls_wR_factor_gt           0.0297 
_refine_ls_goodness_of_fit_ref    0.807 
_refine_ls_restrained_S_all       0.807 
_refine_ls_shift/su_max           0.000 
_refine_ls_shift/su_mean          0.000 
 
loop_ 
 _atom_site_label 
 _atom_site_type_symbol 
 _atom_site_fract_x 
 _atom_site_fract_y 
 _atom_site_fract_z 
 _atom_site_U_iso_or_equiv 
 _atom_site_adp_type 
 _atom_site_occupancy 
 _atom_site_symmetry_multiplicity 
 _atom_site_calc_flag 
 _atom_site_refinement_flags 
 _atom_site_disorder_assembly 
 _atom_site_disorder_group 
Sn1 Sn 0.7500 -0.04163(2) 1.0000 0.02427(9) Uani 1 2 d S . . 
F1 F 0.78479(9) -0.15199(11) 0.92430(9) 0.0417(5) Uani 1 1 d . . . 
O1 O 0.76644(12) 0.09643(13) 0.88460(10) 0.0268(5) Uani 1 1 d . . . 
C1 C 0.61453(15) 0.01059(17) 0.94205(14) 0.0215(7) Uani 1 1 d . . . 
H1A H 0.5882 -0.0401 0.8955 0.026 Uiso 1 1 calc R . . 
H1B H 0.5739 0.0077 0.9839 0.026 Uiso 1 1 calc R . . 
O2 O 0.75309(13) 0.10527(14) 0.69513(11) 0.0324(5) Uani 1 1 d . . . 
C2 C 0.61312(17) 0.1248(2) 0.90721(15) 0.0234(7) Uani 1 1 d . . . 
H2A H 0.6374 0.1753 0.9554 0.028 Uiso 1 1 calc R . . 
O3 O 0.56815(13) 0.10997(14) 0.60293(11) 0.0389(5) Uani 1 1 d . . . 
C3 C 0.67561(17) 0.1341(2) 0.84504(15) 0.0269(7) Uani 1 1 d . . . 
H3A H 0.6504 0.0896 0.7943 0.032 Uiso 1 1 calc R . . 
H3B H 0.6789 0.2110 0.8272 0.032 Uiso 1 1 calc R . . 
O4 O 0.44865(13) 0.25783(14) 0.66888(12) 0.0373(6) Uani 1 1 d . . . 
C4 C 0.83739(18) 0.1167(2) 0.83748(16) 0.0320(8) Uani 1 1 d . . . 
H4A H 0.8991 0.0971 0.8728 0.038 Uiso 1 1 calc R . . 
H4B H 0.8384 0.1956 0.8249 0.038 Uiso 1 1 calc R . . 
O5 O 0.51893(13) 0.27257(15) 0.84376(10) 0.0329(5) Uani 1 1 d . . . 
C5 C 0.82360(18) 0.0547(2) 0.75637(16) 0.0363(8) Uani 1 1 d . . . 
H5A H 0.8831 0.0528 0.7361 0.044 Uiso 1 1 calc R . . 
H5B H 0.8051 -0.0213 0.7656 0.044 Uiso 1 1 calc R . . 
C6 C 0.72371(19) 0.0436(2) 0.62170(16) 0.0412(8) Uani 1 1 d . . . 
H6A H 0.7019 -0.0289 0.6363 0.049 Uiso 1 1 calc R . . 
H6B H 0.7767 0.0329 0.5930 0.049 Uiso 1 1 calc R . . 
C7 C 0.6462(2) 0.1019(2) 0.56458(16) 0.0437(9) Uani 1 1 d . . . 
H7A H 0.6672 0.1758 0.5523 0.052 Uiso 1 1 calc R . . 
H7B H 0.6283 0.0618 0.5104 0.052 Uiso 1 1 calc R . . 
C8 C 0.4941(2) 0.1702(2) 0.55356(17) 0.0427(9) Uani 1 1 d . . . 
H8A H 0.4691 0.1310 0.5000 0.051 Uiso 1 1 calc R . . 
H8B H 0.5173 0.2423 0.5395 0.051 Uiso 1 1 calc R . . 
C9 C 0.4189(2) 0.1847(2) 0.60190(17) 0.0428(9) Uani 1 1 d . . . 
H9A H 0.3616 0.2131 0.5640 0.051 Uiso 1 1 calc R . . 
H9B H 0.4035 0.1134 0.6245 0.051 Uiso 1 1 calc R . . 
C10 C 0.3856(2) 0.2623(2) 0.72436(17) 0.0419(9) Uani 1 1 d . . . 
H10A H 0.3665 0.1875 0.7365 0.050 Uiso 1 1 calc R . . 
H10B H 0.3287 0.3033 0.6974 0.050 Uiso 1 1 calc R . . 
C11 C 0.4311(2) 0.3166(2) 0.80418(18) 0.0431(9) Uani 1 1 d . . . 
H11A H 0.4396 0.3948 0.7923 0.052 Uiso 1 1 calc R . . 
H11B H 0.3884 0.3122 0.8443 0.052 Uiso 1 1 calc R . . 
C12 C 0.51523(18) 0.1613(2) 0.86585(16) 0.0260(7) Uani 1 1 d . . . 
H12A H 0.4913 0.1171 0.8146 0.031 Uiso 1 1 calc R . . 
H12B H 0.4725 0.1515 0.9054 0.031 Uiso 1 1 calc R . . 
 
loop_ 
 _atom_site_aniso_label 
 _atom_site_aniso_U_11 
 _atom_site_aniso_U_22 
 _atom_site_aniso_U_33 
 _atom_site_aniso_U_23 
 _atom_site_aniso_U_13 
 _atom_site_aniso_U_12 
Sn1 0.01912(18) 0.02688(18) 0.02500(16) 0.000 0.00046(12) 0.000 
F1 0.0299(11) 0.0410(11) 0.0492(11) -0.0226(9) -0.0029(9) 0.0050(8) 
O1 0.0177(12) 0.0372(13) 0.0266(11) 0.0112(9) 0.0072(9) 0.0021(10) 
C1 0.0187(17) 0.0266(19) 0.0183(15) 0.0001(12) 0.0019(13) -0.0017(13) 
O2 0.0377(14) 0.0292(12) 0.0321(13) 0.0015(10) 0.0112(11) 0.0053(11) 
C2 0.0204(19) 0.0251(19) 0.0235(17) -0.0006(14) 0.0019(14) 0.0034(15) 
O3 0.0390(15) 0.0488(14) 0.0300(12) 0.0075(10) 0.0098(11) 0.0058(11) 
C3 0.0210(19) 0.0351(19) 0.0243(17) 0.0049(14) 0.0042(14) 0.0046(16) 
O4 0.0347(14) 0.0434(15) 0.0343(13) 0.0055(11) 0.0082(11) -0.0030(11) 
C4 0.0203(19) 0.037(2) 0.0388(19) 0.0066(16) 0.0073(15) 0.0035(15) 
O5 0.0311(14) 0.0348(15) 0.0317(13) 0.0058(10) 0.0043(10) 0.0112(11) 
C5 0.035(2) 0.031(2) 0.048(2) 0.0051(19) 0.0205(16) 0.0089(19) 
C6 0.052(2) 0.0400(19) 0.0377(18) 0.004(2) 0.0241(16) 0.006(2) 
C7 0.058(3) 0.046(2) 0.0301(19) -0.0043(17) 0.0167(18) 0.0008(19) 
C8 0.049(2) 0.047(2) 0.0299(19) 0.0035(16) 0.0039(18) -0.0047(19) 
C9 0.036(2) 0.045(2) 0.041(2) 0.0083(18) -0.0061(17) -0.0041(18) 
C10 0.030(2) 0.050(2) 0.043(2) 0.0184(18) 0.0020(18) 0.0107(18) 
C11 0.034(2) 0.050(2) 0.047(2) 0.0171(18) 0.0118(18) 0.0246(19) 
C12 0.028(2) 0.0257(19) 0.0246(17) 0.0032(14) 0.0057(15) 0.0058(15) 
 
_geom_special_details 
; 
 All esds (except the esd in the dihedral angle between two l.s. planes) 
 are estimated using the full covariance matrix.  The cell esds are taken 
 into account individually in the estimation of esds in distances, angles 
 and torsion angles; correlations between esds in cell parameters are only 
 used when they are defined by crystal symmetry.  An approximate (isotropic) 
 treatment of cell esds is used for estimating esds involving l.s. planes. 
; 
 
loop_ 
 _geom_bond_atom_site_label_1 
 _geom_bond_atom_site_label_2 
 _geom_bond_distance 
 _geom_bond_site_symmetry_2 
 _geom_bond_publ_flag 
Sn1 F1 1.9610(13) . ? 
Sn1 F1 1.9610(13) 2_657 ? 
Sn1 C1 2.102(2) . ? 
Sn1 C1 2.102(2) 2_657 ? 
Sn1 O1 2.5672(16) . ? 
O1 C3 1.422(3) . ? 
O1 C4 1.429(2) . ? 
C1 C2 1.507(3) . ? 
C1 H1A 0.9900 . ? 
C1 H1B 0.9900 . ? 
O2 C6 1.397(3) . ? 
O2 C5 1.413(3) . ? 
C2 C3 1.496(3) . ? 
C2 C12 1.512(3) . ? 
C2 H2A 1.0000 . ? 
O3 C7 1.409(3) . ? 
O3 C8 1.410(3) . ? 
C3 H3A 0.9900 . ? 
C3 H3B 0.9900 . ? 
O4 C9 1.403(3) . ? 
O4 C10 1.414(3) . ? 
C4 C5 1.492(3) . ? 
C4 H4A 0.9900 . ? 
C4 H4B 0.9900 . ? 
O5 C12 1.414(3) . ? 
O5 C11 1.414(3) . ? 
C5 H5A 0.9900 . ? 
C5 H5B 0.9900 . ? 
C6 C7 1.485(3) . ? 
C6 H6A 0.9900 . ? 
C6 H6B 0.9900 . ? 
C7 H7A 0.9900 . ? 
C7 H7B 0.9900 . ? 
C8 C9 1.486(3) . ? 
C8 H8A 0.9900 . ? 
C8 H8B 0.9900 . ? 
C9 H9A 0.9900 . ? 
C9 H9B 0.9900 . ? 
C10 C11 1.480(3) . ? 
C10 H10A 0.9900 . ? 
C10 H10B 0.9900 . ? 
C11 H11A 0.9900 . ? 
C11 H11B 0.9900 . ? 
C12 H12A 0.9900 . ? 
C12 H12B 0.9900 . ? 
 
loop_ 
 _geom_angle_atom_site_label_1 
 _geom_angle_atom_site_label_2 
 _geom_angle_atom_site_label_3 
 _geom_angle 
 _geom_angle_site_symmetry_1 
 _geom_angle_site_symmetry_3 
 _geom_angle_publ_flag 
F1 Sn1 F1 92.77(9) . 2_657 ? 
F1 Sn1 C1 105.90(8) . . ? 
F1 Sn1 C1 98.41(7) 2_657 . ? 
F1 Sn1 C1 98.41(7) . 2_657 ? 
F1 Sn1 C1 105.90(8) 2_657 2_657 ? 
C1 Sn1 C1 144.53(12) . 2_657 ? 
F1 Sn1 O1 85.72(6) . . ? 
F1 Sn1 O1 169.79(6) 2_657 . ? 
C1 Sn1 O1 72.39(7) . . ? 
C1 Sn1 O1 84.31(8) 2_657 . ? 
C3 O1 C4 114.46(18) . . ? 
C3 O1 Sn1 108.72(13) . . ? 
C4 O1 Sn1 133.64(14) . . ? 
C2 C1 Sn1 112.79(16) . . ? 
C2 C1 H1A 109.0 . . ? 
Sn1 C1 H1A 109.0 . . ? 
C2 C1 H1B 109.0 . . ? 
Sn1 C1 H1B 109.0 . . ? 
H1A C1 H1B 107.8 . . ? 
C6 O2 C5 114.0(2) . . ? 
C3 C2 C12 109.4(2) . . ? 
C3 C2 C1 111.09(19) . . ? 
C12 C2 C1 112.2(2) . . ? 
C3 C2 H2A 108.0 . . ? 
C12 C2 H2A 108.0 . . ? 
C1 C2 H2A 108.0 . . ? 
C7 O3 C8 112.4(2) . . ? 
O1 C3 C2 108.3(2) . . ? 
O1 C3 H3A 110.0 . . ? 
C2 C3 H3A 110.0 . . ? 
O1 C3 H3B 110.0 . . ? 
C2 C3 H3B 110.0 . . ? 
H3A C3 H3B 108.4 . . ? 
C9 O4 C10 112.1(2) . . ? 
O1 C4 C5 113.6(2) . . ? 
O1 C4 H4A 108.8 . . ? 
C5 C4 H4A 108.8 . . ? 
O1 C4 H4B 108.8 . . ? 
C5 C4 H4B 108.8 . . ? 
H4A C4 H4B 107.7 . . ? 
C12 O5 C11 113.8(2) . . ? 
O2 C5 C4 109.7(2) . . ? 
O2 C5 H5A 109.7 . . ? 
C4 C5 H5A 109.7 . . ? 
O2 C5 H5B 109.7 . . ? 
C4 C5 H5B 109.7 . . ? 
H5A C5 H5B 108.2 . . ? 
O2 C6 C7 109.1(2) . . ? 
O2 C6 H6A 109.9 . . ? 
C7 C6 H6A 109.9 . . ? 
O2 C6 H6B 109.9 . . ? 
C7 C6 H6B 109.9 . . ? 
H6A C6 H6B 108.3 . . ? 
O3 C7 C6 109.9(2) . . ? 
O3 C7 H7A 109.7 . . ? 
C6 C7 H7A 109.7 . . ? 
O3 C7 H7B 109.7 . . ? 
C6 C7 H7B 109.7 . . ? 
H7A C7 H7B 108.2 . . ? 
O3 C8 C9 109.1(2) . . ? 
O3 C8 H8A 109.9 . . ? 
C9 C8 H8A 109.9 . . ? 
O3 C8 H8B 109.9 . . ? 
C9 C8 H8B 109.9 . . ? 
H8A C8 H8B 108.3 . . ? 
O4 C9 C8 109.8(2) . . ? 
O4 C9 H9A 109.7 . . ? 
C8 C9 H9A 109.7 . . ? 
O4 C9 H9B 109.7 . . ? 
C8 C9 H9B 109.7 . . ? 
H9A C9 H9B 108.2 . . ? 
O4 C10 C11 109.8(2) . . ? 
O4 C10 H10A 109.7 . . ? 
C11 C10 H10A 109.7 . . ? 
O4 C10 H10B 109.7 . . ? 
C11 C10 H10B 109.7 . . ? 
H10A C10 H10B 108.2 . . ? 
O5 C11 C10 114.9(2) . . ? 
O5 C11 H11A 108.5 . . ? 
C10 C11 H11A 108.5 . . ? 
O5 C11 H11B 108.5 . . ? 
C10 C11 H11B 108.5 . . ? 
H11A C11 H11B 107.5 . . ? 
O5 C12 C2 108.4(2) . . ? 
O5 C12 H12A 110.0 . . ? 
C2 C12 H12A 110.0 . . ? 
O5 C12 H12B 110.0 . . ? 
C2 C12 H12B 110.0 . . ? 
H12A C12 H12B 108.4 . . ? 
 
loop_ 
 _geom_torsion_atom_site_label_1 
 _geom_torsion_atom_site_label_2 
 _geom_torsion_atom_site_label_3 
 _geom_torsion_atom_site_label_4 
 _geom_torsion 
 _geom_torsion_site_symmetry_1 
 _geom_torsion_site_symmetry_2 
 _geom_torsion_site_symmetry_3 
 _geom_torsion_site_symmetry_4 
 _geom_torsion_publ_flag 
F1 Sn1 O1 C3 108.89(15) . . . . ? 
F1 Sn1 O1 C3 27.1(4) 2_657 . . . ? 
C1 Sn1 O1 C3 0.72(15) . . . . ? 
C1 Sn1 O1 C3 -152.20(15) 2_657 . . . ? 
F1 Sn1 O1 C4 -49.1(2) . . . . ? 
F1 Sn1 O1 C4 -130.9(3) 2_657 . . . ? 
C1 Sn1 O1 C4 -157.3(2) . . . . ? 
C1 Sn1 O1 C4 49.8(2) 2_657 . . . ? 
F1 Sn1 C1 C2 -108.83(15) . . . . ? 
F1 Sn1 C1 C2 155.83(15) 2_657 . . . ? 
C1 Sn1 C1 C2 22.61(14) 2_657 . . . ? 
O1 Sn1 C1 C2 -28.73(14) . . . . ? 
Sn1 C1 C2 C3 57.3(2) . . . . ? 
Sn1 C1 C2 C12 -179.91(15) . . . . ? 
C4 O1 C3 C2 -170.52(18) . . . . ? 
Sn1 O1 C3 C2 26.8(2) . . . . ? 
C12 C2 C3 O1 -178.4(2) . . . . ? 
C1 C2 C3 O1 -54.0(3) . . . . ? 
C3 O1 C4 C5 -66.2(3) . . . . ? 
Sn1 O1 C4 C5 90.9(3) . . . . ? 
C6 O2 C5 C4 -169.69(19) . . . . ? 
O1 C4 C5 O2 77.5(3) . . . . ? 
C5 O2 C6 C7 176.7(2) . . . . ? 
C8 O3 C7 C6 176.6(2) . . . . ? 
O2 C6 C7 O3 -63.9(3) . . . . ? 
C7 O3 C8 C9 -174.3(2) . . . . ? 
C10 O4 C9 C8 -171.2(2) . . . . ? 
O3 C8 C9 O4 71.0(3) . . . . ? 
C9 O4 C10 C11 165.2(2) . . . . ? 
C12 O5 C11 C10 -59.8(3) . . . . ? 
O4 C10 C11 O5 -52.6(3) . . . . ? 
C11 O5 C12 C2 179.94(19) . . . . ? 
C3 C2 C12 O5 -62.8(3) . . . . ? 
C1 C2 C12 O5 173.43(18) . . . . ? 
 
_diffrn_measured_fraction_theta_max    1.000 
_diffrn_reflns_theta_full              25.49 
_diffrn_measured_fraction_theta_full   1.000 
_refine_diff_density_max    1.096 
_refine_diff_density_min   -0.547 
_refine_diff_density_rms    0.076 

#===END
 
data_compound10_a1532i 
 
_audit_creation_method            SHELXL-97 
_chemical_name_systematic 
; 
diiodido-bis(1,4,7,10-tetraoxacylcotridec-12-ylmethyl)stannane
; 
_chemical_name_common             ? 
_chemical_melting_point           419 
_chemical_formula_moiety          'C20 H38 I2 O8 Sn' 
_chemical_formula_sum 
 'C20 H38 I2 O8 Sn' 
_chemical_formula_weight          778.99 
 
loop_ 
 _atom_type_symbol 
 _atom_type_description 
 _atom_type_scat_dispersion_real 
 _atom_type_scat_dispersion_imag 
 _atom_type_scat_source 
 'C'  'C'   0.0033   0.0016 
 'International Tables Vol C Tables 4.2.6.8 and 6.1.1.4' 
 'H'  'H'   0.0000   0.0000 
 'International Tables Vol C Tables 4.2.6.8 and 6.1.1.4' 
 'O'  'O'   0.0106   0.0060 
 'International Tables Vol C Tables 4.2.6.8 and 6.1.1.4' 
 'Sn'  'Sn'  -0.6537   1.4246 
 'International Tables Vol C Tables 4.2.6.8 and 6.1.1.4' 
 'I'  'I'  -0.4742   1.8119 
 'International Tables Vol C Tables 4.2.6.8 and 6.1.1.4' 
 
_symmetry_cell_setting            monoclinic 
_symmetry_space_group_name_H-M    'I 2/a'
_symmetry_space_group_name_Hall   '-I 2ya' 
 
loop_ 
 _symmetry_equiv_pos_as_xyz 
 'x, y, z' 
 '-x+1/2, y, -z' 
 'x+1/2, y+1/2, z+1/2' 
 '-x+1, y+1/2, -z+1/2' 
 '-x, -y, -z' 
 'x-1/2, -y, z' 
 '-x+1/2, -y+1/2, -z+1/2' 
 'x, -y+1/2, z+1/2' 
 
_cell_length_a                    14.020(5) 
_cell_length_b                    11.6934(7) 
_cell_length_c                    17.380(3) 
_cell_angle_alpha                 90.00 
_cell_angle_beta                  101.20(4) 
_cell_angle_gamma                 90.00 
_cell_volume                      2795.0(12) 
_cell_formula_units_Z             4 
_cell_measurement_temperature     173(2) 
_cell_measurement_reflns_used     4058
_cell_measurement_theta_min     2.2816
_cell_measurement_theta_max     29.1688
 
_exptl_crystal_description        block 
_exptl_crystal_colour             colourless 
_exptl_crystal_size_max           0.25 
_exptl_crystal_size_mid           0.24 
_exptl_crystal_size_min           0.14 
_exptl_crystal_density_meas       ? 
_exptl_crystal_density_diffrn     1.851 
_exptl_crystal_density_method     'not measured' 
_exptl_crystal_F_000              1512 
_exptl_absorpt_coefficient_mu     3.160 
_exptl_absorpt_correction_T_min                   0.83603
_exptl_absorpt_correction_T_max                   1.00000
_exptl_absorpt_correction_type            'multi-scan'
_exptl_absorpt_process_details
;
CrysAlisPro, Oxford Diffraction Ltd.,
Version 1.171.33.55 (release 05-01-2010 CrysAlis171 .NET)
(compiled Jan  5 2010,16:28:46)
Empirical absorption correction using spherical harmonics,
 implemented in SCALE3 ABSPACK scaling algorithm.
;  
 
_diffrn_ambient_temperature       173(2) 
_diffrn_radiation_wavelength      0.71073 
_diffrn_radiation_type            MoK\a 
_diffrn_radiation_source          'fine-focus sealed tube'
_diffrn_measurement_device        'Xcalibur2 CCD Diffractometer'  
_diffrn_radiation_monochromator   graphite 
_diffrn_measurement_device_type   ? 
_diffrn_measurement_method        '\w und \y scan' 
_diffrn_detector_area_resol_mean  ? 
_diffrn_standards_number          ? 
_diffrn_standards_interval_count  ? 
_diffrn_standards_interval_time   ? 
_diffrn_standards_decay_%         ? 
_diffrn_reflns_number             6981 
_diffrn_reflns_av_R_equivalents   0.0362 
_diffrn_reflns_av_sigmaI/netI     0.0446 
_diffrn_reflns_limit_h_min        -16 
_diffrn_reflns_limit_h_max        14 
_diffrn_reflns_limit_k_min        -14 
_diffrn_reflns_limit_k_max        14 
_diffrn_reflns_limit_l_min        -21 
_diffrn_reflns_limit_l_max        20 
_diffrn_reflns_theta_min          2.29 
_diffrn_reflns_theta_max          25.50 
_reflns_number_total              2605 
_reflns_number_gt                 2044 
_reflns_threshold_expression      >2sigma(I) 
 
_computing_data_collection        
;CrysAlisPro, Oxford Diffraction Ltd., Version 1.171.33.55'
;  
_computing_cell_refinement        
;CrysAlisPro, Oxford Diffraction Ltd., Version 1.171.33.55'
;
_computing_data_reduction         
;CrysAlisPro, Oxford Diffraction Ltd., Version 1.171.33.55'
;
_computing_structure_solution     'SHELXS-97 (Sheldrick, 1990)' 
_computing_structure_refinement   'SHELXL-97 (Sheldrick, 1997)' 
_computing_molecular_graphics     'SHELXP-97 (Sheldrick, 1997)' 
_computing_publication_material   'enCIFer Version 1.4'  
 
_refine_special_details 
; 
 Refinement of F^2^ against ALL reflections.  The weighted R-factor wR and 
 goodness of fit S are based on F^2^, conventional R-factors R are based 
 on F, with F set to zero for negative F^2^. The threshold expression of 
 F^2^ > 2sigma(F^2^) is used only for calculating R-factors(gt) etc. and is 
 not relevant to the choice of reflections for refinement.  R-factors based 
 on F^2^ are statistically about twice as large as those based on F, and R- 
 factors based on ALL data will be even larger. 
; 
 
_refine_ls_structure_factor_coef  Fsqd  
_refine_ls_matrix_type            full 
_refine_ls_weighting_scheme       calc  
_refine_ls_weighting_details 
 'calc w=1/[\s^2^(Fo^2^)+(0.0267P)^2^+0.0000P] where P=(Fo^2^+2Fc^2^)/3' 
_atom_sites_solution_primary      direct 
_atom_sites_solution_secondary    difmap 
_atom_sites_solution_hydrogens    geom 
_refine_ls_hydrogen_treatment     constr
_refine_ls_extinction_method      none 
_refine_ls_extinction_coef        ? 
_refine_ls_number_reflns          2605 
_refine_ls_number_parameters      141 
_refine_ls_number_restraints      0 
_refine_ls_R_factor_all           0.0377 
_refine_ls_R_factor_gt            0.0258 
_refine_ls_wR_factor_ref          0.0551 
_refine_ls_wR_factor_gt           0.0535 
_refine_ls_goodness_of_fit_ref    0.913 
_refine_ls_restrained_S_all       0.913 
_refine_ls_shift/su_max           0.001 
_refine_ls_shift/su_mean          0.000 
 
loop_ 
 _atom_site_label 
 _atom_site_type_symbol 
 _atom_site_fract_x 
 _atom_site_fract_y 
 _atom_site_fract_z 
 _atom_site_U_iso_or_equiv 
 _atom_site_adp_type 
 _atom_site_occupancy 
 _atom_site_symmetry_multiplicity 
 _atom_site_calc_flag 
 _atom_site_refinement_flags 
 _atom_site_disorder_assembly 
 _atom_site_disorder_group 
Sn1 Sn 0.7500 0.51485(3) 0.5000 0.01950(10) Uani 1 2 d S . . 
I1 I 0.841432(19) 0.35703(2) 0.416490(17) 0.03642(10) Uani 1 1 d . . . 
O1 O 0.68724(17) 0.6663(2) 0.57627(14) 0.0240(6) Uani 1 1 d . . . 
O4 O 0.93196(18) 0.8022(2) 0.73297(15) 0.0340(7) Uani 1 1 d . . . 
O2 O 0.6169(2) 0.8882(2) 0.61027(16) 0.0379(7) Uani 1 1 d . . . 
O3 O 0.8143(2) 0.9544(2) 0.62915(17) 0.0403(7) Uani 1 1 d . . . 
C3 C 0.7569(2) 0.6814(3) 0.6484(2) 0.0248(8) Uani 1 1 d . . . 
H3A H 0.7483 0.6215 0.6868 0.030 Uiso 1 1 calc R . . 
H3B H 0.7484 0.7572 0.6716 0.030 Uiso 1 1 calc R . . 
C1 C 0.8696(3) 0.5567(3) 0.5910(2) 0.0244(9) Uani 1 1 d . . . 
H1A H 0.8771 0.4966 0.6319 0.029 Uiso 1 1 calc R . . 
H1B H 0.9299 0.5584 0.5693 0.029 Uiso 1 1 calc R . . 
C2 C 0.8560(3) 0.6723(3) 0.6281(2) 0.0240(8) Uani 1 1 d . . . 
H2A H 0.8622 0.7336 0.5893 0.029 Uiso 1 1 calc R . . 
C10 C 0.9344(3) 0.6907(3) 0.7006(2) 0.0314(9) Uani 1 1 d . . . 
H10A H 0.9263 0.6334 0.7407 0.038 Uiso 1 1 calc R . . 
H10B H 0.9988 0.6781 0.6867 0.038 Uiso 1 1 calc R . . 
C4 C 0.5892(3) 0.6893(3) 0.5843(2) 0.0318(10) Uani 1 1 d . . . 
H4A H 0.5834 0.6783 0.6397 0.038 Uiso 1 1 calc R . . 
H4B H 0.5447 0.6347 0.5518 0.038 Uiso 1 1 calc R . . 
C8 C 0.8987(3) 0.9876(3) 0.6816(3) 0.0443(12) Uani 1 1 d . . . 
H8A H 0.8825 1.0087 0.7327 0.053 Uiso 1 1 calc R . . 
H8B H 0.9280 1.0551 0.6607 0.053 Uiso 1 1 calc R . . 
C9 C 0.9686(3) 0.8916(4) 0.6921(3) 0.0386(11) Uani 1 1 d . . . 
H9A H 0.9781 0.8638 0.6403 0.046 Uiso 1 1 calc R . . 
H9B H 1.0322 0.9176 0.7222 0.046 Uiso 1 1 calc R . . 
C5 C 0.5601(3) 0.8090(4) 0.5594(3) 0.0446(12) Uani 1 1 d . . . 
H5A H 0.5694 0.8216 0.5051 0.054 Uiso 1 1 calc R . . 
H5B H 0.4905 0.8206 0.5606 0.054 Uiso 1 1 calc R . . 
C6 C 0.6497(3) 0.9844(4) 0.5724(3) 0.0548(14) Uani 1 1 d . . . 
H6A H 0.5977 1.0428 0.5614 0.066 Uiso 1 1 calc R . . 
H6B H 0.6668 0.9608 0.5221 0.066 Uiso 1 1 calc R . . 
C7 C 0.7363(4) 1.0324(4) 0.6253(3) 0.0545(14) Uani 1 1 d . . . 
H7A H 0.7538 1.1070 0.6050 0.065 Uiso 1 1 calc R . . 
H7B H 0.7220 1.0445 0.6783 0.065 Uiso 1 1 calc R . . 
 
loop_ 
 _atom_site_aniso_label 
 _atom_site_aniso_U_11 
 _atom_site_aniso_U_22 
 _atom_site_aniso_U_33 
 _atom_site_aniso_U_23 
 _atom_site_aniso_U_13 
 _atom_site_aniso_U_12 
Sn1 0.0242(2) 0.01449(19) 0.0208(2) 0.000 0.00685(15) 0.000 
I1 0.03857(18) 0.02771(16) 0.0450(2) -0.01359(13) 0.01308(13) 0.00434(13) 
O1 0.0261(13) 0.0264(15) 0.0199(14) -0.0041(11) 0.0056(11) 0.0027(11) 
O4 0.0409(16) 0.0355(16) 0.0273(16) -0.0081(13) 0.0111(12) -0.0088(14) 
O2 0.0511(18) 0.0333(17) 0.0305(17) -0.0021(14) 0.0107(14) 0.0102(14) 
O3 0.0500(18) 0.0348(17) 0.0364(18) -0.0017(14) 0.0087(14) 0.0023(15) 
C3 0.030(2) 0.025(2) 0.019(2) -0.0026(16) 0.0043(16) 0.0038(18) 
C1 0.029(2) 0.024(2) 0.021(2) 0.0012(16) 0.0046(16) 0.0027(17) 
C2 0.031(2) 0.024(2) 0.017(2) -0.0015(16) 0.0059(16) 0.0008(17) 
C10 0.035(2) 0.034(2) 0.025(2) -0.0029(19) 0.0060(17) 0.005(2) 
C4 0.026(2) 0.042(2) 0.029(2) -0.011(2) 0.0085(17) 0.002(2) 
C8 0.065(3) 0.030(2) 0.041(3) -0.006(2) 0.019(2) -0.015(2) 
C9 0.045(3) 0.041(3) 0.031(3) -0.007(2) 0.010(2) -0.021(2) 
C5 0.041(3) 0.056(3) 0.035(3) -0.016(2) 0.003(2) 0.020(2) 
C6 0.062(3) 0.050(3) 0.058(3) 0.026(3) 0.024(3) 0.023(3) 
C7 0.070(3) 0.028(3) 0.069(4) 0.007(2) 0.026(3) 0.008(3) 
 
_geom_special_details 
; 
 All esds (except the esd in the dihedral angle between two l.s. planes) 
 are estimated using the full covariance matrix.  The cell esds are taken 
 into account individually in the estimation of esds in distances, angles 
 and torsion angles; correlations between esds in cell parameters are only 
 used when they are defined by crystal symmetry.  An approximate (isotropic) 
 treatment of cell esds is used for estimating esds involving l.s. planes. 
; 
 
loop_ 
 _geom_bond_atom_site_label_1 
 _geom_bond_atom_site_label_2 
 _geom_bond_distance 
 _geom_bond_site_symmetry_2 
 _geom_bond_publ_flag 
Sn1 C1 2.126(4) . ? 
Sn1 C1 2.126(4) 2_656 ? 
Sn1 O1 2.474(2) . ? 
Sn1 O1 2.474(2) 2_656 ? 
Sn1 I1 2.8068(6) . ? 
Sn1 I1 2.8068(6) 2_656 ? 
O1 C4 1.434(4) . ? 
O1 C3 1.443(4) . ? 
O4 C9 1.415(5) . ? 
O4 C10 1.423(4) . ? 
O2 C5 1.414(5) . ? 
O2 C6 1.423(5) . ? 
O3 C8 1.401(5) . ? 
O3 C7 1.415(5) . ? 
C3 C2 1.502(5) . ? 
C3 H3A 0.9900 . ? 
C3 H3B 0.9900 . ? 
C1 C2 1.527(5) . ? 
C1 H1A 0.9900 . ? 
C1 H1B 0.9900 . ? 
C2 C10 1.517(5) . ? 
C2 H2A 1.0000 . ? 
C10 H10A 0.9900 . ? 
C10 H10B 0.9900 . ? 
C4 C5 1.498(6) . ? 
C4 H4A 0.9900 . ? 
C4 H4B 0.9900 . ? 
C8 C9 1.478(6) . ? 
C8 H8A 0.9900 . ? 
C8 H8B 0.9900 . ? 
C9 H9A 0.9900 . ? 
C9 H9B 0.9900 . ? 
C5 H5A 0.9900 . ? 
C5 H5B 0.9900 . ? 
C6 C7 1.483(7) . ? 
C6 H6A 0.9900 . ? 
C6 H6B 0.9900 . ? 
C7 H7A 0.9900 . ? 
C7 H7B 0.9900 . ? 
 
loop_ 
 _geom_angle_atom_site_label_1 
 _geom_angle_atom_site_label_2 
 _geom_angle_atom_site_label_3 
 _geom_angle 
 _geom_angle_site_symmetry_1 
 _geom_angle_site_symmetry_3 
 _geom_angle_publ_flag 
C1 Sn1 C1 153.4(2) . 2_656 ? 
C1 Sn1 O1 75.41(11) . . ? 
C1 Sn1 O1 85.56(11) 2_656 . ? 
C1 Sn1 O1 85.56(11) . 2_656 ? 
C1 Sn1 O1 75.41(11) 2_656 2_656 ? 
O1 Sn1 O1 88.59(11) . 2_656 ? 
C1 Sn1 I1 99.34(9) . . ? 
C1 Sn1 I1 98.05(10) 2_656 . ? 
O1 Sn1 I1 173.41(6) . . ? 
O1 Sn1 I1 87.01(6) 2_656 . ? 
C1 Sn1 I1 98.05(10) . 2_656 ? 
C1 Sn1 I1 99.34(10) 2_656 2_656 ? 
O1 Sn1 I1 87.01(6) . 2_656 ? 
O1 Sn1 I1 173.41(6) 2_656 2_656 ? 
I1 Sn1 I1 97.78(2) . 2_656 ? 
C4 O1 C3 113.1(3) . . ? 
C4 O1 Sn1 129.4(2) . . ? 
C3 O1 Sn1 107.59(18) . . ? 
C9 O4 C10 116.1(3) . . ? 
C5 O2 C6 115.0(4) . . ? 
C8 O3 C7 113.6(4) . . ? 
O1 C3 C2 106.7(3) . . ? 
O1 C3 H3A 110.4 . . ? 
C2 C3 H3A 110.4 . . ? 
O1 C3 H3B 110.4 . . ? 
C2 C3 H3B 110.4 . . ? 
H3A C3 H3B 108.6 . . ? 
C2 C1 Sn1 111.9(2) . . ? 
C2 C1 H1A 109.2 . . ? 
Sn1 C1 H1A 109.2 . . ? 
C2 C1 H1B 109.2 . . ? 
Sn1 C1 H1B 109.2 . . ? 
H1A C1 H1B 107.9 . . ? 
C3 C2 C10 110.4(3) . . ? 
C3 C2 C1 111.0(3) . . ? 
C10 C2 C1 110.3(3) . . ? 
C3 C2 H2A 108.3 . . ? 
C10 C2 H2A 108.3 . . ? 
C1 C2 H2A 108.3 . . ? 
O4 C10 C2 112.9(3) . . ? 
O4 C10 H10A 109.0 . . ? 
C2 C10 H10A 109.0 . . ? 
O4 C10 H10B 109.0 . . ? 
C2 C10 H10B 109.0 . . ? 
H10A C10 H10B 107.8 . . ? 
O1 C4 C5 111.1(3) . . ? 
O1 C4 H4A 109.4 . . ? 
C5 C4 H4A 109.4 . . ? 
O1 C4 H4B 109.4 . . ? 
C5 C4 H4B 109.4 . . ? 
H4A C4 H4B 108.0 . . ? 
O3 C8 C9 109.0(3) . . ? 
O3 C8 H8A 109.9 . . ? 
C9 C8 H8A 109.9 . . ? 
O3 C8 H8B 109.9 . . ? 
C9 C8 H8B 109.9 . . ? 
H8A C8 H8B 108.3 . . ? 
O4 C9 C8 109.1(3) . . ? 
O4 C9 H9A 109.9 . . ? 
C8 C9 H9A 109.9 . . ? 
O4 C9 H9B 109.9 . . ? 
C8 C9 H9B 109.9 . . ? 
H9A C9 H9B 108.3 . . ? 
O2 C5 C4 110.1(3) . . ? 
O2 C5 H5A 109.6 . . ? 
C4 C5 H5A 109.6 . . ? 
O2 C5 H5B 109.6 . . ? 
C4 C5 H5B 109.6 . . ? 
H5A C5 H5B 108.2 . . ? 
O2 C6 C7 108.1(4) . . ? 
O2 C6 H6A 110.1 . . ? 
C7 C6 H6A 110.1 . . ? 
O2 C6 H6B 110.1 . . ? 
C7 C6 H6B 110.1 . . ? 
H6A C6 H6B 108.4 . . ? 
O3 C7 C6 108.5(4) . . ? 
O3 C7 H7A 110.0 . . ? 
C6 C7 H7A 110.0 . . ? 
O3 C7 H7B 110.0 . . ? 
C6 C7 H7B 110.0 . . ? 
H7A C7 H7B 108.4 . . ? 
 
loop_ 
 _geom_torsion_atom_site_label_1 
 _geom_torsion_atom_site_label_2 
 _geom_torsion_atom_site_label_3 
 _geom_torsion_atom_site_label_4 
 _geom_torsion 
 _geom_torsion_site_symmetry_1 
 _geom_torsion_site_symmetry_2 
 _geom_torsion_site_symmetry_3 
 _geom_torsion_site_symmetry_4 
 _geom_torsion_publ_flag 
C1 Sn1 O1 C4 -154.7(3) . . . . ? 
C1 Sn1 O1 C4 44.1(3) 2_656 . . . ? 
O1 Sn1 O1 C4 119.5(3) 2_656 . . . ? 
I1 Sn1 O1 C4 167.6(4) . . . . ? 
I1 Sn1 O1 C4 -55.6(3) 2_656 . . . ? 
C1 Sn1 O1 C3 -12.3(2) . . . . ? 
C1 Sn1 O1 C3 -173.6(2) 2_656 . . . ? 
O1 Sn1 O1 C3 -98.1(2) 2_656 . . . ? 
I1 Sn1 O1 C3 -50.0(6) . . . . ? 
I1 Sn1 O1 C3 86.8(2) 2_656 . . . ? 
C4 O1 C3 C2 -171.4(3) . . . . ? 
Sn1 O1 C3 C2 39.5(3) . . . . ? 
C1 Sn1 C1 C2 27.6(2) 2_656 . . . ? 
O1 Sn1 C1 C2 -18.1(2) . . . . ? 
O1 Sn1 C1 C2 71.6(2) 2_656 . . . ? 
I1 Sn1 C1 C2 157.8(2) . . . . ? 
I1 Sn1 C1 C2 -102.9(2) 2_656 . . . ? 
O1 C3 C2 C10 178.4(3) . . . . ? 
O1 C3 C2 C1 -59.0(4) . . . . ? 
Sn1 C1 C2 C3 48.4(4) . . . . ? 
Sn1 C1 C2 C10 171.2(2) . . . . ? 
C9 O4 C10 C2 -75.5(4) . . . . ? 
C3 C2 C10 O4 -63.3(4) . . . . ? 
C1 C2 C10 O4 173.6(3) . . . . ? 
C3 O1 C4 C5 96.4(4) . . . . ? 
Sn1 O1 C4 C5 -122.8(3) . . . . ? 
C7 O3 C8 C9 169.6(3) . . . . ? 
C10 O4 C9 C8 132.1(4) . . . . ? 
O3 C8 C9 O4 -68.5(4) . . . . ? 
C6 O2 C5 C4 138.0(4) . . . . ? 
O1 C4 C5 O2 -64.8(4) . . . . ? 
C5 O2 C6 C7 -157.7(3) . . . . ? 
C8 O3 C7 C6 -176.2(4) . . . . ? 
O2 C6 C7 O3 69.6(5) . . . . ? 
 
_diffrn_measured_fraction_theta_max    1.000 
_diffrn_reflns_theta_full              25.50 
_diffrn_measured_fraction_theta_full   1.000 
_refine_diff_density_max    0.829 
_refine_diff_density_min   -0.621 
_refine_diff_density_rms    0.101 

#===END
 
data_compound11_va299i 
 
_audit_creation_method            SHELXL-97 
_chemical_name_systematic 
; 
dibromido-bis(1,4,7,10-tetraoxacylcotridec-12-ylmethyl)stannane 
; 
_chemical_name_common             ? 
_chemical_melting_point           402 
_chemical_formula_moiety          'C20 H20 Br2 O8 Sn'  
_chemical_formula_sum 
 'C20 H20 Br2 O8 Sn' 
_chemical_formula_weight          666.87 
 
loop_ 
 _atom_type_symbol 
 _atom_type_description 
 _atom_type_scat_dispersion_real 
 _atom_type_scat_dispersion_imag 
 _atom_type_scat_source 
 'C'  'C'   0.0033   0.0016 
 'International Tables Vol C Tables 4.2.6.8 and 6.1.1.4' 
 'H'  'H'   0.0000   0.0000 
 'International Tables Vol C Tables 4.2.6.8 and 6.1.1.4' 
 'O'  'O'   0.0106   0.0060 
 'International Tables Vol C Tables 4.2.6.8 and 6.1.1.4' 
 'Br'  'Br'  -0.2901   2.4595 
 'International Tables Vol C Tables 4.2.6.8 and 6.1.1.4' 
 'Sn'  'Sn'  -0.6537   1.4246 
 'International Tables Vol C Tables 4.2.6.8 and 6.1.1.4' 
 
_symmetry_cell_setting            monoclinic 
_symmetry_space_group_name_H-M    'I 2/a'
_symmetry_space_group_name_Hall   '-I 2ya'  
 
loop_ 
 _symmetry_equiv_pos_as_xyz 
 'x, y, z' 
 '-x+1/2, y, -z' 
 'x+1/2, y+1/2, z+1/2' 
 '-x+1, y+1/2, -z+1/2' 
 '-x, -y, -z' 
 'x-1/2, -y, z' 
 '-x+1/2, -y+1/2, -z+1/2' 
 'x, -y+1/2, z+1/2' 
 
_cell_length_a                    13.743(3) 
_cell_length_b                    11.334(2) 
_cell_length_c                    17.683(4) 
_cell_angle_alpha                 90.00 
_cell_angle_beta                  97.82(3) 
_cell_angle_gamma                 90.00 
_cell_volume                      2728.7(9) 
_cell_formula_units_Z             4 
_cell_measurement_temperature     173(2) 
_cell_measurement_reflns_used     8551
_cell_measurement_theta_min       2 
_cell_measurement_theta_max       28 
 
_exptl_crystal_description        block
_exptl_crystal_colour             colourless 
_exptl_crystal_size_max           0.35 
_exptl_crystal_size_mid           0.30 
_exptl_crystal_size_min           0.20 
_exptl_crystal_density_meas       ? 
_exptl_crystal_density_diffrn     1.623 
_exptl_crystal_density_method     'not measured' 
_exptl_crystal_F_000              1296 
_exptl_absorpt_coefficient_mu     3.901 
_exptl_absorpt_correction_type    'multi-scan'
_exptl_absorpt_correction_T_min   0.5081 
_exptl_absorpt_correction_T_max   0.7456 
_exptl_absorpt_process_details    'SADABS'       
 
_exptl_special_details 
; 
 ? 
; 
 
_diffrn_ambient_temperature       173(2) 
_diffrn_radiation_wavelength      0.71073 
_diffrn_radiation_type            MoK\a 
_diffrn_radiation_source          'sealed Tube'           
_diffrn_radiation_monochromator   graphite 
_diffrn_measurement_device_type   'SMART APEX2'           
_diffrn_measurement_device        '\k-geometry diffractometer'        
_diffrn_measurement_method        'CCD scan' 
_diffrn_detector_area_resol_mean  ? 
_diffrn_standards_number          ? 
_diffrn_standards_interval_count  ? 
_diffrn_standards_interval_time   ? 
_diffrn_standards_decay_%         ? 
_diffrn_reflns_number             20658 
_diffrn_reflns_av_R_equivalents   0.0376 
_diffrn_reflns_av_sigmaI/netI     0.0204 
_diffrn_reflns_limit_h_min        -16 
_diffrn_reflns_limit_h_max        16 
_diffrn_reflns_limit_k_min        -13 
_diffrn_reflns_limit_k_max        13 
_diffrn_reflns_limit_l_min        -21 
_diffrn_reflns_limit_l_max        21 
_diffrn_reflns_theta_min          2.14 
_diffrn_reflns_theta_max          25.50 
_reflns_number_total              2537 
_reflns_number_gt                 2248 
_reflns_threshold_expression      >2sigma(I)   
 
_computing_structure_solution     'SHELXS-97 (Sheldrick, 1990)' 
_computing_structure_refinement   'SHELXL-97 (Sheldrick, 1997)' 
_computing_molecular_graphics     'SHELXP-97 (Sheldrick, 1997)' 
_computing_publication_material   'enCIFer Version 1.4'  
 
_refine_special_details 
; 
 Refinement of F^2^ against ALL reflections.  The weighted R-factor wR and 
 goodness of fit S are based on F^2^, conventional R-factors R are based 
 on F, with F set to zero for negative F^2^. The threshold expression of 
 F^2^ > 2sigma(F^2^) is used only for calculating R-factors(gt) etc. and is 
 not relevant to the choice of reflections for refinement.  R-factors based 
 on F^2^ are statistically about twice as large as those based on F, and R- 
 factors based on ALL data will be even larger. 
; 
 
_refine_ls_structure_factor_coef  Fsqd  
_refine_ls_matrix_type            full 
_refine_ls_weighting_scheme       calc  
_refine_ls_weighting_details 
 'calc w=1/[\s^2^(Fo^2^)+(0.0919P)^2^+18.7344P] where P=(Fo^2^+2Fc^2^)/3' 
_atom_sites_solution_primary      direct 
_atom_sites_solution_secondary    difmap 
_atom_sites_solution_hydrogens    geom 
_refine_ls_hydrogen_treatment     constr
_refine_ls_extinction_method      none 
_refine_ls_extinction_coef        ? 
_refine_ls_number_reflns          2537 
_refine_ls_number_parameters      148 
_refine_ls_number_restraints      0 
_refine_ls_R_factor_all           0.0492 
_refine_ls_R_factor_gt            0.0420 
_refine_ls_wR_factor_ref          0.1482 
_refine_ls_wR_factor_gt           0.1430 
_refine_ls_goodness_of_fit_ref    1.122 
_refine_ls_restrained_S_all       1.122 
_refine_ls_shift/su_max           0.001 
_refine_ls_shift/su_mean          0.000 
 
loop_ 
 _atom_site_label 
 _atom_site_type_symbol 
 _atom_site_fract_x 
 _atom_site_fract_y 
 _atom_site_fract_z 
 _atom_site_U_iso_or_equiv 
 _atom_site_adp_type 
 _atom_site_occupancy 
 _atom_site_symmetry_multiplicity 
 _atom_site_calc_flag 
 _atom_site_refinement_flags 
 _atom_site_disorder_assembly 
 _atom_site_disorder_group 
Sn1 Sn 0.2500 0.50930(6) 0.0000 0.0184(3) Uani 0.875(7) 2 d SP . 1 
Br1 Br 0.15275(11) 0.35990(13) 0.07396(6) 0.0366(3) Uani 0.875(7) 1 d P . 1 
Br1' Br 0.1626(19) 0.348(2) 0.0573(13) 0.0366(3) Uani 0.06 1 d P . 2 
Sn1' Sn 0.2543(7) 0.5080(3) 0.0243(3) 0.0184(3) Uani 0.12 1 d P . 2 
O1 O 0.1815(3) 0.6668(3) 0.07459(19) 0.0251(9) Uani 1 1 d . . . 
C1 C 0.3664(4) 0.5485(5) 0.0887(3) 0.0264(12) Uani 1 1 d . . . 
H1A H 0.3699 0.4860 0.1281 0.032 Uiso 1 1 calc R . 1 
H1B H 0.4294 0.5486 0.0674 0.032 Uiso 1 1 calc R . 1 
C2 C 0.3526(4) 0.6687(5) 0.1261(3) 0.0241(11) Uani 1 1 d . . . 
H2A H 0.3635 0.7322 0.0889 0.029 Uiso 1 1 calc R . . 
O2 O 0.1151(3) 0.9016(4) 0.1098(2) 0.0411(11) Uani 1 1 d . . . 
C3 C 0.2484(4) 0.6809(5) 0.1460(3) 0.0284(12) Uani 1 1 d . . . 
H3A H 0.2355 0.6194 0.1832 0.034 Uiso 1 1 calc R . . 
H3B H 0.2393 0.7593 0.1687 0.034 Uiso 1 1 calc R . . 
O3 O 0.3179(3) 0.9641(4) 0.1322(3) 0.0420(11) Uani 1 1 d . . . 
O4 O 0.4234(3) 0.7965(4) 0.2322(2) 0.0326(10) Uani 1 1 d . . . 
C4 C 0.0825(4) 0.6988(6) 0.0806(3) 0.0378(14) Uani 1 1 d . . . 
H4A H 0.0703 0.6884 0.1341 0.045 Uiso 1 1 calc R . . 
H4B H 0.0375 0.6456 0.0482 0.045 Uiso 1 1 calc R . . 
C5 C 0.0609(5) 0.8236(7) 0.0568(4) 0.0466(18) Uani 1 1 d . . . 
H5A H 0.0791 0.8368 0.0052 0.056 Uiso 1 1 calc R . . 
H5B H -0.0103 0.8393 0.0548 0.056 Uiso 1 1 calc R . . 
C6 C 0.1546(6) 1.0021(7) 0.0769(5) 0.053(2) Uani 1 1 d . . . 
H6A H 0.1037 1.0643 0.0675 0.063 Uiso 1 1 calc R . . 
H6B H 0.1758 0.9806 0.0274 0.063 Uiso 1 1 calc R . . 
C7 C 0.2398(6) 1.0472(7) 0.1297(5) 0.058(2) Uani 1 1 d . . . 
H7A H 0.2610 1.1245 0.1116 0.069 Uiso 1 1 calc R . . 
H7B H 0.2212 1.0578 0.1814 0.069 Uiso 1 1 calc R . . 
C8 C 0.4002(6) 0.9941(5) 0.1848(4) 0.0406(16) Uani 1 1 d . . . 
H8A H 0.3795 1.0155 0.2345 0.049 Uiso 1 1 calc R . . 
H8B H 0.4346 1.0626 0.1659 0.049 Uiso 1 1 calc R . . 
C9 C 0.4674(5) 0.8890(6) 0.1941(4) 0.0390(14) Uani 1 1 d . . . 
H9A H 0.4804 0.8613 0.1433 0.047 Uiso 1 1 calc R . . 
H9B H 0.5308 0.9115 0.2240 0.047 Uiso 1 1 calc R . . 
C10 C 0.4269(4) 0.6846(5) 0.1975(3) 0.0313(13) Uani 1 1 d . . . 
H10A H 0.4152 0.6232 0.2351 0.038 Uiso 1 1 calc R . . 
H10B H 0.4937 0.6721 0.1839 0.038 Uiso 1 1 calc R . . 
 
loop_ 
 _atom_site_aniso_label 
 _atom_site_aniso_U_11 
 _atom_site_aniso_U_22 
 _atom_site_aniso_U_33 
 _atom_site_aniso_U_23 
 _atom_site_aniso_U_13 
 _atom_site_aniso_U_12 
Sn1 0.0278(4) 0.0212(3) 0.0051(5) 0.000 -0.0010(7) 0.000 
Br1 0.0333(5) 0.0278(5) 0.0489(8) 0.0171(5) 0.0062(4) -0.0065(3) 
Br1' 0.0333(5) 0.0278(5) 0.0489(8) 0.0171(5) 0.0062(4) -0.0065(3) 
Sn1' 0.0278(4) 0.0212(3) 0.0051(5) 0.000 -0.0010(7) 0.000 
O1 0.0233(18) 0.0290(19) 0.0218(18) -0.0048(15) -0.0009(14) 0.0098(16) 
C1 0.023(3) 0.023(3) 0.032(3) 0.000(2) 0.000(2) 0.005(2) 
C2 0.022(2) 0.024(3) 0.026(2) 0.001(2) 0.001(2) 0.002(2) 
O2 0.046(3) 0.044(3) 0.034(2) -0.0014(19) 0.0077(18) 0.013(2) 
C3 0.026(3) 0.034(3) 0.025(3) 0.000(2) 0.002(2) 0.002(2) 
O3 0.041(3) 0.038(2) 0.046(3) 0.000(2) 0.004(2) 0.008(2) 
O4 0.036(2) 0.033(2) 0.0293(19) -0.0040(16) 0.0062(16) -0.0071(17) 
C4 0.026(3) 0.053(4) 0.033(3) -0.009(3) -0.002(2) 0.007(3) 
C5 0.043(4) 0.062(4) 0.033(3) -0.012(3) -0.005(3) 0.026(3) 
C6 0.049(4) 0.051(5) 0.060(5) 0.023(3) 0.016(4) 0.025(3) 
C7 0.065(5) 0.035(4) 0.076(5) 0.013(4) 0.021(4) 0.017(4) 
C8 0.052(4) 0.031(3) 0.041(3) -0.003(2) 0.011(3) -0.010(3) 
C9 0.036(3) 0.044(4) 0.038(3) -0.006(3) 0.006(3) -0.016(3) 
C10 0.031(3) 0.033(3) 0.029(3) 0.000(2) 0.000(2) 0.007(2) 
 
_geom_special_details 
; 
 All esds (except the esd in the dihedral angle between two l.s. planes) 
 are estimated using the full covariance matrix.  The cell esds are taken 
 into account individually in the estimation of esds in distances, angles 
 and torsion angles; correlations between esds in cell parameters are only 
 used when they are defined by crystal symmetry.  An approximate (isotropic) 
 treatment of cell esds is used for estimating esds involving l.s. planes. 
; 
 
loop_ 
 _geom_bond_atom_site_label_1 
 _geom_bond_atom_site_label_2 
 _geom_bond_distance 
 _geom_bond_site_symmetry_2 
 _geom_bond_publ_flag 
Sn1 C1 2.130(5) 2 ? 
Sn1 C1 2.130(5) . ? 
Sn1 O1 2.480(4) . ? 
Sn1 O1 2.480(4) 2 ? 
Sn1 Br1 2.6152(14) . ? 
Sn1 Br1 2.6152(14) 2 ? 
Br1' Sn1' 2.33(3) . ? 
Br1' Sn1' 2.67(2) 2 ? 
Sn1' Sn1' 0.851(11) 2 ? 
Sn1' O1 2.296(7) . ? 
Sn1' C1 2.460(9) 2 ? 
Sn1' Br1' 2.67(2) 2 ? 
O1 C4 1.426(7) . ? 
O1 C3 1.466(6) . ? 
C1 C2 1.537(7) . ? 
C1 Sn1' 2.460(9) 2 ? 
C1 H1A 0.9900 . ? 
C1 H1B 0.9900 . ? 
C2 C10 1.523(7) . ? 
C2 C3 1.527(7) . ? 
C2 H2A 1.0000 . ? 
O2 C6 1.420(9) . ? 
O2 C5 1.424(8) . ? 
C3 H3A 0.9900 . ? 
C3 H3B 0.9900 . ? 
O3 C8 1.406(8) . ? 
O3 C7 1.423(9) . ? 
O4 C10 1.413(7) . ? 
O4 C9 1.424(7) . ? 
C4 C5 1.494(10) . ? 
C4 H4A 0.9900 . ? 
C4 H4B 0.9900 . ? 
C5 H5A 0.9900 . ? 
C5 H5B 0.9900 . ? 
C6 C7 1.486(12) . ? 
C6 H6A 0.9900 . ? 
C6 H6B 0.9900 . ? 
C7 H7A 0.9900 . ? 
C7 H7B 0.9900 . ? 
C8 C9 1.503(9) . ? 
C8 H8A 0.9900 . ? 
C8 H8B 0.9900 . ? 
C9 H9A 0.9900 . ? 
C9 H9B 0.9900 . ? 
C10 H10A 0.9900 . ? 
C10 H10B 0.9900 . ? 
 
loop_ 
 _geom_angle_atom_site_label_1 
 _geom_angle_atom_site_label_2 
 _geom_angle_atom_site_label_3 
 _geom_angle 
 _geom_angle_site_symmetry_1 
 _geom_angle_site_symmetry_3 
 _geom_angle_publ_flag 
C1 Sn1 C1 155.9(3) 2 . ? 
C1 Sn1 O1 86.56(17) 2 . ? 
C1 Sn1 O1 76.09(16) . . ? 
C1 Sn1 O1 76.09(16) 2 2 ? 
C1 Sn1 O1 86.56(17) . 2 ? 
O1 Sn1 O1 87.94(19) . 2 ? 
C1 Sn1 Br1 96.87(15) 2 . ? 
C1 Sn1 Br1 98.66(15) . . ? 
O1 Sn1 Br1 86.74(10) . . ? 
O1 Sn1 Br1 171.43(10) 2 . ? 
C1 Sn1 Br1 98.66(15) 2 2 ? 
C1 Sn1 Br1 96.87(15) . 2 ? 
O1 Sn1 Br1 171.43(10) . 2 ? 
O1 Sn1 Br1 86.74(10) 2 2 ? 
Br1 Sn1 Br1 99.30(6) . 2 ? 
Sn1' Br1' Sn1' 18.0(3) . 2 ? 
Sn1' Sn1' O1 112.5(8) 2 . ? 
Sn1' Sn1' Br1' 104.3(10) 2 . ? 
O1 Sn1' Br1' 103.5(7) . . ? 
Sn1' Sn1' C1 36.4(11) 2 2 ? 
O1 Sn1' C1 83.5(3) . 2 ? 
Br1' Sn1' C1 91.2(7) . 2 ? 
Sn1' Sn1' Br1' 57.7(9) 2 2 ? 
O1 Sn1' Br1' 169.4(5) . 2 ? 
Br1' Sn1' Br1' 83.8(11) . 2 ? 
C1 Sn1' Br1' 88.8(6) 2 2 ? 
C4 O1 C3 113.6(4) . . ? 
C4 O1 Sn1' 134.4(4) . . ? 
C3 O1 Sn1' 99.4(3) . . ? 
C4 O1 Sn1 131.2(3) . . ? 
C3 O1 Sn1 107.3(3) . . ? 
Sn1' O1 Sn1 9.23(13) . . ? 
C2 C1 Sn1 112.2(3) . . ? 
C2 C1 Sn1' 113.9(3) . 2 ? 
Sn1 C1 Sn1' 6.7(2) . 2 ? 
C2 C1 H1A 109.2 . . ? 
Sn1 C1 H1A 109.2 . . ? 
Sn1' C1 H1A 113.6 2 . ? 
C2 C1 H1B 109.2 . . ? 
Sn1 C1 H1B 109.2 . . ? 
Sn1' C1 H1B 102.7 2 . ? 
H1A C1 H1B 107.9 . . ? 
C10 C2 C3 110.0(4) . . ? 
C10 C2 C1 110.6(4) . . ? 
C3 C2 C1 110.7(4) . . ? 
C10 C2 H2A 108.4 . . ? 
C3 C2 H2A 108.4 . . ? 
C1 C2 H2A 108.4 . . ? 
C6 O2 C5 115.1(6) . . ? 
O1 C3 C2 106.8(4) . . ? 
O1 C3 H3A 110.4 . . ? 
C2 C3 H3A 110.4 . . ? 
O1 C3 H3B 110.4 . . ? 
C2 C3 H3B 110.4 . . ? 
H3A C3 H3B 108.6 . . ? 
C8 O3 C7 113.3(6) . . ? 
C10 O4 C9 114.5(4) . . ? 
O1 C4 C5 112.0(6) . . ? 
O1 C4 H4A 109.2 . . ? 
C5 C4 H4A 109.2 . . ? 
O1 C4 H4B 109.2 . . ? 
C5 C4 H4B 109.2 . . ? 
H4A C4 H4B 107.9 . . ? 
O2 C5 C4 109.6(5) . . ? 
O2 C5 H5A 109.7 . . ? 
C4 C5 H5A 109.7 . . ? 
O2 C5 H5B 109.7 . . ? 
C4 C5 H5B 109.7 . . ? 
H5A C5 H5B 108.2 . . ? 
O2 C6 C7 109.3(6) . . ? 
O2 C6 H6A 109.8 . . ? 
C7 C6 H6A 109.8 . . ? 
O2 C6 H6B 109.8 . . ? 
C7 C6 H6B 109.8 . . ? 
H6A C6 H6B 108.3 . . ? 
O3 C7 C6 108.6(6) . . ? 
O3 C7 H7A 110.0 . . ? 
C6 C7 H7A 110.0 . . ? 
O3 C7 H7B 110.0 . . ? 
C6 C7 H7B 110.0 . . ? 
H7A C7 H7B 108.4 . . ? 
O3 C8 C9 107.9(5) . . ? 
O3 C8 H8A 110.1 . . ? 
C9 C8 H8A 110.1 . . ? 
O3 C8 H8B 110.1 . . ? 
C9 C8 H8B 110.1 . . ? 
H8A C8 H8B 108.4 . . ? 
O4 C9 C8 110.0(5) . . ? 
O4 C9 H9A 109.7 . . ? 
C8 C9 H9A 109.7 . . ? 
O4 C9 H9B 109.7 . . ? 
C8 C9 H9B 109.7 . . ? 
H9A C9 H9B 108.2 . . ? 
O4 C10 C2 114.0(4) . . ? 
O4 C10 H10A 108.7 . . ? 
C2 C10 H10A 108.7 . . ? 
O4 C10 H10B 108.7 . . ? 
C2 C10 H10B 108.7 . . ? 
H10A C10 H10B 107.6 . . ? 
 
loop_ 
 _geom_torsion_atom_site_label_1 
 _geom_torsion_atom_site_label_2 
 _geom_torsion_atom_site_label_3 
 _geom_torsion_atom_site_label_4 
 _geom_torsion 
 _geom_torsion_site_symmetry_1 
 _geom_torsion_site_symmetry_2 
 _geom_torsion_site_symmetry_3 
 _geom_torsion_site_symmetry_4 
 _geom_torsion_publ_flag 
Sn1' Br1' Sn1' O1 117.9(13) 2 . . . ? 
Sn1' Br1' Sn1' C1 34.3(10) 2 . . 2 ? 
Sn1' Br1' Sn1' Br1' -54.3(13) 2 . . 2 ? 
Sn1' Sn1' O1 C4 72.8(14) 2 . . . ? 
Br1' Sn1' O1 C4 -39.2(9) . . . . ? 
C1 Sn1' O1 C4 50.4(5) 2 . . . ? 
Br1' Sn1' O1 C4 94(4) 2 . . . ? 
Sn1' Sn1' O1 C3 -150.3(13) 2 . . . ? 
Br1' Sn1' O1 C3 97.7(8) . . . . ? 
C1 Sn1' O1 C3 -172.7(3) 2 . . . ? 
Br1' Sn1' O1 C3 -129(4) 2 . . . ? 
Sn1' Sn1' O1 Sn1 -1.1(3) 2 . . . ? 
Br1' Sn1' O1 Sn1 -113.1(16) . . . . ? 
C1 Sn1' O1 Sn1 -23.5(12) 2 . . . ? 
Br1' Sn1' O1 Sn1 20(3) 2 . . . ? 
C1 Sn1 O1 C4 38.6(5) 2 . . . ? 
C1 Sn1 O1 C4 -158.3(5) . . . . ? 
O1 Sn1 O1 C4 114.8(5) 2 . . . ? 
Br1 Sn1 O1 C4 -58.5(5) . . . . ? 
Br1 Sn1 O1 C4 166.4(5) 2 . . . ? 
C1 Sn1 O1 C3 -175.3(3) 2 . . . ? 
C1 Sn1 O1 C3 -12.2(3) . . . . ? 
O1 Sn1 O1 C3 -99.1(3) 2 . . . ? 
Br1 Sn1 O1 C3 87.6(3) . . . . ? 
Br1 Sn1 O1 C3 -47.5(8) 2 . . . ? 
C1 Sn1 O1 Sn1' 152.7(14) 2 . . . ? 
C1 Sn1 O1 Sn1' -44.1(13) . . . . ? 
O1 Sn1 O1 Sn1' -131.1(13) 2 . . . ? 
Br1 Sn1 O1 Sn1' 55.6(13) . . . . ? 
Br1 Sn1 O1 Sn1' -79.5(15) 2 . . . ? 
C1 Sn1 C1 C2 26.9(3) 2 . . . ? 
O1 Sn1 C1 C2 -18.2(3) . . . . ? 
O1 Sn1 C1 C2 70.5(4) 2 . . . ? 
Br1 Sn1 C1 C2 -102.6(4) . . . . ? 
Br1 Sn1 C1 C2 156.8(3) 2 . . . ? 
C1 Sn1 C1 Sn1' -79.5(9) 2 . . 2 ? 
O1 Sn1 C1 Sn1' -124.6(9) . . . 2 ? 
O1 Sn1 C1 Sn1' -35.9(9) 2 . . 2 ? 
Br1 Sn1 C1 Sn1' 150.9(9) . . . 2 ? 
Br1 Sn1 C1 Sn1' 50.4(9) 2 . . 2 ? 
Sn1 C1 C2 C10 170.4(4) . . . . ? 
Sn1' C1 C2 C10 177.4(4) 2 . . . ? 
Sn1 C1 C2 C3 48.1(5) . . . . ? 
Sn1' C1 C2 C3 55.1(5) 2 . . . ? 
C4 O1 C3 C2 -168.2(5) . . . . ? 
Sn1' O1 C3 C2 44.0(5) . . . . ? 
Sn1 O1 C3 C2 39.1(5) . . . . ? 
C10 C2 C3 O1 179.0(4) . . . . ? 
C1 C2 C3 O1 -58.4(5) . . . . ? 
C3 O1 C4 C5 94.5(6) . . . . ? 
Sn1' O1 C4 C5 -132.8(5) . . . . ? 
Sn1 O1 C4 C5 -121.0(5) . . . . ? 
C6 O2 C5 C4 140.7(6) . . . . ? 
O1 C4 C5 O2 -67.2(6) . . . . ? 
C5 O2 C6 C7 -156.6(6) . . . . ? 
C8 O3 C7 C6 -175.8(6) . . . . ? 
O2 C6 C7 O3 69.1(8) . . . . ? 
C7 O3 C8 C9 168.2(6) . . . . ? 
C10 O4 C9 C8 132.7(5) . . . . ? 
O3 C8 C9 O4 -68.7(6) . . . . ? 
C9 O4 C10 C2 -76.5(6) . . . . ? 
C3 C2 C10 O4 -61.5(6) . . . . ? 
C1 C2 C10 O4 175.8(4) . . . . ? 
 
_diffrn_measured_fraction_theta_max    1.000 
_diffrn_reflns_theta_full              25.50 
_diffrn_measured_fraction_theta_full   1.000 
_refine_diff_density_max    1.942 
_refine_diff_density_min   -1.518 
_refine_diff_density_rms    0.167 

#===END
 
data_compound12_a1593o 
 
_audit_creation_method            SHELXL-97 
_chemical_name_systematic 
; 
difluorido-bis(1,4,7,10-tetraoxacylcotridec-12-ylmethyl)stannane
; 
_chemical_name_common             ? 
_chemical_melting_point           404 
_chemical_formula_moiety          'C20 H38 F2 O8 Sn'
_chemical_formula_sum 
 'C20 H38 F2 O8 Sn' 
_chemical_formula_weight          563.19 
 
loop_ 
 _atom_type_symbol 
 _atom_type_description 
 _atom_type_scat_dispersion_real 
 _atom_type_scat_dispersion_imag 
 _atom_type_scat_source 
 'C'  'C'   0.0033   0.0016 
 'International Tables Vol C Tables 4.2.6.8 and 6.1.1.4' 
 'H'  'H'   0.0000   0.0000 
 'International Tables Vol C Tables 4.2.6.8 and 6.1.1.4' 
 'O'  'O'   0.0106   0.0060 
 'International Tables Vol C Tables 4.2.6.8 and 6.1.1.4' 
 'F'  'F'   0.0171   0.0103 
 'International Tables Vol C Tables 4.2.6.8 and 6.1.1.4' 
 'Sn'  'Sn'  -0.6537   1.4246 
 'International Tables Vol C Tables 4.2.6.8 and 6.1.1.4' 
 
_symmetry_cell_setting            orthorhombic 
_symmetry_space_group_name_H-M    Pbca
_symmetry_space_group_name_Hall   '-P 2ac 2ab'
 
loop_ 
 _symmetry_equiv_pos_as_xyz 
 'x, y, z' 
 '-x+1/2, -y, z+1/2' 
 '-x, y+1/2, -z+1/2' 
 'x+1/2, -y+1/2, -z' 
 '-x, -y, -z' 
 'x-1/2, y, -z-1/2' 
 'x, -y-1/2, z-1/2' 
 '-x-1/2, y-1/2, z' 
 
_cell_length_a                    16.6098(7) 
_cell_length_b                    14.2088(7) 
_cell_length_c                    19.5728(10) 
_cell_angle_alpha                 90.00 
_cell_angle_beta                  90.00 
_cell_angle_gamma                 90.00 
_cell_volume                      4619.3(4) 
_cell_formula_units_Z             8 
_cell_measurement_temperature     173(2) 
_cell_measurement_reflns_used     5020
_cell_measurement_theta_min     2.4106
_cell_measurement_theta_max     29.1078 
 
_exptl_crystal_description        column 
_exptl_crystal_colour             colourless 
_exptl_crystal_size_max           0.50 
_exptl_crystal_size_mid           0.11 
_exptl_crystal_size_min           0.08 
_exptl_crystal_density_meas       ? 
_exptl_crystal_density_diffrn     1.620 
_exptl_crystal_density_method     'not measured' 
_exptl_crystal_F_000              2320 
_exptl_absorpt_coefficient_mu     1.165 
_exptl_absorpt_correction_T_min                   0.82108
_exptl_absorpt_correction_T_max                   1.00000
_exptl_absorpt_correction_type            'multi-scan'
_exptl_absorpt_process_details
;
CrysAlisPro, Oxford Diffraction Ltd.,
Version 1.171.33.55 (release 05-01-2010 CrysAlis171 .NET)
(compiled Jan  5 2010,16:28:46)
Empirical absorption correction using spherical harmonics,
 implemented in SCALE3 ABSPACK scaling algorithm.
;
 
_diffrn_ambient_temperature       173(2) 
_diffrn_radiation_wavelength      0.71073 
_diffrn_radiation_type            MoK\a 
_diffrn_radiation_source          'fine-focus sealed tube'
_diffrn_measurement_device        'Xcalibur2 CCD Diffractometer'  
_diffrn_radiation_monochromator   graphite 
_diffrn_measurement_device_type   ? 
_diffrn_measurement_method        '\w und \y scan' 
_diffrn_detector_area_resol_mean  ? 
_diffrn_standards_number          ? 
_diffrn_standards_interval_count  ? 
_diffrn_standards_interval_time   ? 
_diffrn_standards_decay_%         ? 
_diffrn_reflns_number             14098 
_diffrn_reflns_av_R_equivalents   0.0487 
_diffrn_reflns_av_sigmaI/netI     0.0805 
_diffrn_reflns_limit_h_min        -20 
_diffrn_reflns_limit_h_max        20 
_diffrn_reflns_limit_k_min        -17 
_diffrn_reflns_limit_k_max        16 
_diffrn_reflns_limit_l_min        -20 
_diffrn_reflns_limit_l_max        23 
_diffrn_reflns_theta_min          2.42 
_diffrn_reflns_theta_max          25.49 
_reflns_number_total              4297 
_reflns_number_gt                 2656 
_reflns_threshold_expression      >2sigma(I) 
 
_computing_data_collection        
;CrysAlisPro, Oxford Diffraction Ltd., Version 1.171.33.55'
;  
_computing_cell_refinement        
;CrysAlisPro, Oxford Diffraction Ltd., Version 1.171.33.55'
;
_computing_data_reduction         
;CrysAlisPro, Oxford Diffraction Ltd., Version 1.171.33.55'
;
_computing_structure_solution     'SHELXS-97 (Sheldrick, 1990)' 
_computing_structure_refinement   'SHELXL-97 (Sheldrick, 1997)' 
_computing_molecular_graphics     'SHELXP-97 (Sheldrick, 1997)' 
_computing_publication_material   'enCIFer Version 1.4'  
 
_refine_special_details 
; 
 Refinement of F^2^ against ALL reflections.  The weighted R-factor wR and 
 goodness of fit S are based on F^2^, conventional R-factors R are based 
 on F, with F set to zero for negative F^2^. The threshold expression of 
 F^2^ > 2sigma(F^2^) is used only for calculating R-factors(gt) etc. and is 
 not relevant to the choice of reflections for refinement.  R-factors based 
 on F^2^ are statistically about twice as large as those based on F, and R- 
 factors based on ALL data will be even larger. 
; 
 
_refine_ls_structure_factor_coef  Fsqd  
_refine_ls_matrix_type            full 
_refine_ls_weighting_scheme       calc  
_refine_ls_weighting_details 
 'calc w=1/[\s^2^(Fo^2^)+(0.0170P)^2^+0.0000P] where P=(Fo^2^+2Fc^2^)/3' 
_atom_sites_solution_primary      direct 
_atom_sites_solution_secondary    difmap 
_atom_sites_solution_hydrogens    geom 
_refine_ls_hydrogen_treatment     constr
_refine_ls_extinction_method      none 
_refine_ls_extinction_coef        ? 
_refine_ls_number_reflns          4297 
_refine_ls_number_parameters      280 
_refine_ls_number_restraints      0 
_refine_ls_R_factor_all           0.0611 
_refine_ls_R_factor_gt            0.0292 
_refine_ls_wR_factor_ref          0.0521 
_refine_ls_wR_factor_gt           0.0499 
_refine_ls_goodness_of_fit_ref    0.856 
_refine_ls_restrained_S_all       0.856 
_refine_ls_shift/su_max           0.001 
_refine_ls_shift/su_mean          0.000 
 
loop_ 
 _atom_site_label 
 _atom_site_type_symbol 
 _atom_site_fract_x 
 _atom_site_fract_y 
 _atom_site_fract_z 
 _atom_site_U_iso_or_equiv 
 _atom_site_adp_type 
 _atom_site_occupancy 
 _atom_site_symmetry_multiplicity 
 _atom_site_calc_flag 
 _atom_site_refinement_flags 
 _atom_site_disorder_assembly 
 _atom_site_disorder_group 
Sn1 Sn 0.085661(12) 0.366946(17) 0.414311(11) 0.01603(7) Uani 1 1 d . . . 
F1 F 0.00752(9) 0.38544(15) 0.33746(9) 0.0253(5) Uani 1 1 d . . . 
F2 F -0.00561(10) 0.32734(14) 0.47373(9) 0.0242(5) Uani 1 1 d . . . 
O1 O 0.17923(12) 0.38839(16) 0.31503(11) 0.0193(6) Uani 1 1 d . . . 
C1 C 0.13609(18) 0.2325(2) 0.39461(18) 0.0193(9) Uani 1 1 d . . . 
H1A H 0.1544 0.2054 0.4385 0.023 Uiso 1 1 calc R . . 
H1B H 0.0931 0.1912 0.3766 0.023 Uiso 1 1 calc R . . 
O2 O 0.30839(13) 0.50142(18) 0.28535(12) 0.0249(7) Uani 1 1 d . . . 
C2 C 0.20677(17) 0.2308(2) 0.34445(17) 0.0170(9) Uani 1 1 d . . . 
H2A H 0.2089 0.1660 0.3245 0.020 Uiso 1 1 calc R . . 
O3 O 0.42765(13) 0.40140(17) 0.35809(12) 0.0257(6) Uani 1 1 d . . . 
C3 C 0.1931(2) 0.2980(2) 0.28610(18) 0.0206(9) Uani 1 1 d . . . 
H3A H 0.2409 0.2996 0.2559 0.025 Uiso 1 1 calc R . . 
H3B H 0.1460 0.2779 0.2588 0.025 Uiso 1 1 calc R . . 
O4 O 0.34801(12) 0.21623(17) 0.33367(12) 0.0224(6) Uani 1 1 d . . . 
C4 C 0.17246(18) 0.4629(3) 0.26662(18) 0.0233(10) Uani 1 1 d . . . 
H4A H 0.1511 0.5195 0.2899 0.028 Uiso 1 1 calc R . . 
H4B H 0.1334 0.4444 0.2308 0.028 Uiso 1 1 calc R . . 
C5 C 0.25146(18) 0.4872(3) 0.23335(19) 0.0244(9) Uani 1 1 d . . . 
H5A H 0.2689 0.4353 0.2030 0.029 Uiso 1 1 calc R . . 
H5B H 0.2457 0.5450 0.2055 0.029 Uiso 1 1 calc R . . 
C6 C 0.38927(18) 0.5009(3) 0.2622(2) 0.0267(10) Uani 1 1 d . . . 
H6A H 0.4022 0.5612 0.2394 0.032 Uiso 1 1 calc R . . 
H6B H 0.3976 0.4492 0.2291 0.032 Uiso 1 1 calc R . . 
C7 C 0.4422(2) 0.4873(3) 0.3231(2) 0.0285(10) Uani 1 1 d . . . 
H7A H 0.4991 0.4890 0.3083 0.034 Uiso 1 1 calc R . . 
H7B H 0.4337 0.5403 0.3552 0.034 Uiso 1 1 calc R . . 
C8 C 0.46261(19) 0.3224(3) 0.32608(19) 0.0245(9) Uani 1 1 d . . . 
H8A H 0.5217 0.3236 0.3326 0.029 Uiso 1 1 calc R . . 
H8B H 0.4514 0.3242 0.2764 0.029 Uiso 1 1 calc R . . 
C9 C 0.42851(18) 0.2343(3) 0.3563(2) 0.0250(9) Uani 1 1 d . . . 
H9A H 0.4632 0.1804 0.3436 0.030 Uiso 1 1 calc R . . 
H9B H 0.4288 0.2397 0.4067 0.030 Uiso 1 1 calc R . . 
C10 C 0.28744(17) 0.2482(3) 0.37887(18) 0.0186(9) Uani 1 1 d . . . 
H10A H 0.2945 0.3161 0.3884 0.022 Uiso 1 1 calc R . . 
H10B H 0.2904 0.2134 0.4226 0.022 Uiso 1 1 calc R . . 
O101 O 0.15298(12) 0.36026(18) 0.53002(11) 0.0211(6) Uani 1 1 d . . . 
C101 C 0.1095(2) 0.5076(2) 0.44215(18) 0.0217(9) Uani 1 1 d . . . 
H10C H 0.1276 0.5422 0.4011 0.026 Uiso 1 1 calc R . . 
H10D H 0.0587 0.5369 0.4578 0.026 Uiso 1 1 calc R . . 
O102 O 0.26084(12) 0.29184(16) 0.63481(12) 0.0207(6) Uani 1 1 d . . . 
C102 C 0.17288(19) 0.5194(3) 0.49813(17) 0.0205(9) Uani 1 1 d . . . 
H10E H 0.1682 0.5852 0.5158 0.025 Uiso 1 1 calc R . . 
O103 O 0.38542(13) 0.42055(18) 0.62233(13) 0.0231(6) Uani 1 1 d . . . 
C103 C 0.1571(2) 0.4540(2) 0.55739(19) 0.0249(10) Uani 1 1 d . . . 
H10F H 0.2010 0.4586 0.5914 0.030 Uiso 1 1 calc R . . 
H10G H 0.1057 0.4706 0.5800 0.030 Uiso 1 1 calc R . . 
O104 O 0.31188(13) 0.54211(17) 0.52232(13) 0.0272(7) Uani 1 1 d . . . 
C104 C 0.13478(19) 0.2891(3) 0.57879(19) 0.0236(9) Uani 1 1 d . . . 
H10H H 0.0934 0.2463 0.5598 0.028 Uiso 1 1 calc R . . 
H10I H 0.1124 0.3186 0.6205 0.028 Uiso 1 1 calc R . . 
C105 C 0.20810(19) 0.2338(3) 0.59700(18) 0.0238(9) Uani 1 1 d . . . 
H10J H 0.1928 0.1782 0.6245 0.029 Uiso 1 1 calc R . . 
H10K H 0.2352 0.2115 0.5549 0.029 Uiso 1 1 calc R . . 
C106 C 0.34153(18) 0.2581(3) 0.63654(19) 0.0251(10) Uani 1 1 d . . . 
H10L H 0.3579 0.2365 0.5905 0.030 Uiso 1 1 calc R . . 
H10M H 0.3457 0.2042 0.6684 0.030 Uiso 1 1 calc R . . 
C107 C 0.39514(18) 0.3360(2) 0.65959(19) 0.0248(10) Uani 1 1 d . . . 
H10N H 0.3844 0.3488 0.7085 0.030 Uiso 1 1 calc R . . 
H10O H 0.4518 0.3151 0.6555 0.030 Uiso 1 1 calc R . . 
C108 C 0.39842(19) 0.4106(3) 0.55123(18) 0.0235(9) Uani 1 1 d . . . 
H10P H 0.3581 0.3670 0.5316 0.028 Uiso 1 1 calc R . . 
H10Q H 0.4527 0.3843 0.5427 0.028 Uiso 1 1 calc R . . 
C109 C 0.3910(2) 0.5057(3) 0.51847(19) 0.0284(10) Uani 1 1 d . . . 
H10R H 0.4284 0.5499 0.5413 0.034 Uiso 1 1 calc R . . 
H10S H 0.4071 0.5010 0.4699 0.034 Uiso 1 1 calc R . . 
C110 C 0.25842(19) 0.5073(3) 0.47124(19) 0.0243(9) Uani 1 1 d . . . 
H11A H 0.2696 0.4400 0.4621 0.029 Uiso 1 1 calc R . . 
H11B H 0.2654 0.5429 0.4282 0.029 Uiso 1 1 calc R . . 
 
loop_ 
 _atom_site_aniso_label 
 _atom_site_aniso_U_11 
 _atom_site_aniso_U_22 
 _atom_site_aniso_U_33 
 _atom_site_aniso_U_23 
 _atom_site_aniso_U_13 
 _atom_site_aniso_U_12 
Sn1 0.01363(10) 0.01805(12) 0.01642(11) -0.00193(14) -0.00065(12) 0.00111(15) 
F1 0.0173(9) 0.0398(14) 0.0189(11) -0.0026(11) -0.0075(8) -0.0046(11) 
F2 0.0157(9) 0.0327(12) 0.0241(12) 0.0015(10) 0.0067(9) 0.0015(10) 
O1 0.0223(12) 0.0210(16) 0.0145(14) 0.0031(12) 0.0023(10) 0.0025(13) 
C1 0.0167(17) 0.015(2) 0.026(2) -0.0009(17) -0.0015(15) -0.0024(18) 
O2 0.0202(13) 0.0302(16) 0.0244(16) -0.0027(13) 0.0023(11) 0.0038(13) 
C2 0.0170(17) 0.016(2) 0.018(2) -0.0040(18) 0.0003(15) 0.0036(17) 
O3 0.0263(14) 0.0231(14) 0.0278(16) 0.0023(12) 0.0006(12) 0.0013(13) 
C3 0.0207(19) 0.024(2) 0.017(2) -0.0006(18) 0.0016(16) 0.0035(19) 
O4 0.0106(11) 0.0289(16) 0.0276(15) -0.0038(14) 0.0003(11) 0.0023(12) 
C4 0.0197(19) 0.029(2) 0.021(2) 0.0083(19) 0.0023(17) 0.005(2) 
C5 0.027(2) 0.029(2) 0.017(2) 0.0041(19) 0.0005(17) 0.003(2) 
C6 0.023(2) 0.024(2) 0.033(3) 0.007(2) 0.0105(17) 0.0021(18) 
C7 0.021(2) 0.026(2) 0.039(3) 0.003(2) -0.0034(18) -0.003(2) 
C8 0.0189(19) 0.028(2) 0.027(2) 0.006(2) -0.0036(16) 0.004(2) 
C9 0.0128(19) 0.024(2) 0.038(3) 0.0043(19) -0.0004(16) 0.0067(19) 
C10 0.0161(18) 0.019(2) 0.021(2) -0.0015(18) -0.0007(15) 0.0019(18) 
O101 0.0279(12) 0.0199(14) 0.0156(13) 0.0048(14) -0.0027(10) -0.0022(14) 
C101 0.026(2) 0.017(2) 0.022(2) -0.0040(18) 0.0018(15) 0.0072(18) 
O102 0.0167(12) 0.0238(15) 0.0216(15) -0.0008(13) -0.0029(11) -0.0035(13) 
C102 0.028(2) 0.018(2) 0.016(2) -0.0023(18) 0.0014(17) -0.0056(19) 
O103 0.0217(13) 0.0223(15) 0.0255(16) -0.0005(13) 0.0006(11) -0.0020(12) 
C103 0.028(2) 0.027(2) 0.020(2) -0.0017(19) 0.0021(17) -0.003(2) 
O104 0.0226(13) 0.0243(17) 0.0347(17) -0.0036(13) -0.0034(12) -0.0034(13) 
C104 0.0244(19) 0.031(2) 0.016(2) 0.006(2) -0.0038(17) -0.0128(19) 
C105 0.033(2) 0.020(2) 0.019(2) 0.0064(18) -0.0047(18) -0.0106(19) 
C106 0.023(2) 0.025(2) 0.028(2) 0.004(2) 0.0052(17) 0.008(2) 
C107 0.0138(19) 0.030(2) 0.031(2) 0.0009(19) 0.0005(15) -0.0009(18) 
C108 0.015(2) 0.030(2) 0.025(2) 0.001(2) 0.0064(16) -0.0002(18) 
C109 0.019(2) 0.037(3) 0.029(3) 0.001(2) 0.0045(16) -0.006(2) 
C110 0.030(2) 0.018(2) 0.025(3) -0.0020(19) 0.0020(17) -0.004(2) 
 
_geom_special_details 
; 
 All esds (except the esd in the dihedral angle between two l.s. planes) 
 are estimated using the full covariance matrix.  The cell esds are taken 
 into account individually in the estimation of esds in distances, angles 
 and torsion angles; correlations between esds in cell parameters are only 
 used when they are defined by crystal symmetry.  An approximate (isotropic) 
 treatment of cell esds is used for estimating esds involving l.s. planes. 
; 
 
loop_ 
 _geom_bond_atom_site_label_1 
 _geom_bond_atom_site_label_2 
 _geom_bond_distance 
 _geom_bond_site_symmetry_2 
 _geom_bond_publ_flag 
Sn1 F2 1.9918(17) . ? 
Sn1 F1 2.0041(17) . ? 
Sn1 C101 2.109(3) . ? 
Sn1 C1 2.121(3) . ? 
Sn1 O1 2.507(2) . ? 
Sn1 O101 2.527(2) . ? 
O1 C3 1.423(4) . ? 
O1 C4 1.425(4) . ? 
C1 C2 1.531(4) . ? 
C1 H1A 0.9900 . ? 
C1 H1B 0.9900 . ? 
O2 C5 1.404(4) . ? 
O2 C6 1.418(3) . ? 
C2 C3 1.506(5) . ? 
C2 C10 1.520(4) . ? 
C2 H2A 1.0000 . ? 
O3 C8 1.410(4) . ? 
O3 C7 1.420(4) . ? 
C3 H3A 0.9900 . ? 
C3 H3B 0.9900 . ? 
O4 C10 1.415(4) . ? 
O4 C9 1.432(4) . ? 
C4 C5 1.505(4) . ? 
C4 H4A 0.9900 . ? 
C4 H4B 0.9900 . ? 
C5 H5A 0.9900 . ? 
C5 H5B 0.9900 . ? 
C6 C7 1.494(5) . ? 
C6 H6A 0.9900 . ? 
C6 H6B 0.9900 . ? 
C7 H7A 0.9900 . ? 
C7 H7B 0.9900 . ? 
C8 C9 1.496(4) . ? 
C8 H8A 0.9900 . ? 
C8 H8B 0.9900 . ? 
C9 H9A 0.9900 . ? 
C9 H9B 0.9900 . ? 
C10 H10A 0.9900 . ? 
C10 H10B 0.9900 . ? 
O101 C104 1.423(4) . ? 
O101 C103 1.437(4) . ? 
C101 C102 1.528(4) . ? 
C101 H10C 0.9900 . ? 
C101 H10D 0.9900 . ? 
O102 C105 1.412(4) . ? 
O102 C106 1.424(4) . ? 
C102 C103 1.509(5) . ? 
C102 C110 1.525(4) . ? 
C102 H10E 1.0000 . ? 
O103 C107 1.415(4) . ? 
O103 C108 1.415(4) . ? 
C103 H10F 0.9900 . ? 
C103 H10G 0.9900 . ? 
O104 C109 1.414(4) . ? 
O104 C110 1.426(4) . ? 
C104 C105 1.492(4) . ? 
C104 H10H 0.9900 . ? 
C104 H10I 0.9900 . ? 
C105 H10J 0.9900 . ? 
C105 H10K 0.9900 . ? 
C106 C107 1.490(4) . ? 
C106 H10L 0.9900 . ? 
C106 H10M 0.9900 . ? 
C107 H10N 0.9900 . ? 
C107 H10O 0.9900 . ? 
C108 C109 1.501(5) . ? 
C108 H10P 0.9900 . ? 
C108 H10Q 0.9900 . ? 
C109 H10R 0.9900 . ? 
C109 H10S 0.9900 . ? 
C110 H11A 0.9900 . ? 
C110 H11B 0.9900 . ? 
 
loop_ 
 _geom_angle_atom_site_label_1 
 _geom_angle_atom_site_label_2 
 _geom_angle_atom_site_label_3 
 _geom_angle 
 _geom_angle_site_symmetry_1 
 _geom_angle_site_symmetry_3 
 _geom_angle_publ_flag 
F2 Sn1 F1 88.99(7) . . ? 
F2 Sn1 C101 105.07(11) . . ? 
F1 Sn1 C101 101.04(11) . . ? 
F2 Sn1 C1 98.76(11) . . ? 
F1 Sn1 C1 103.73(11) . . ? 
C101 Sn1 C1 145.70(12) . . ? 
F2 Sn1 O1 163.49(7) . . ? 
F1 Sn1 O1 78.68(7) . . ? 
C101 Sn1 O1 88.20(11) . . ? 
C1 Sn1 O1 73.96(10) . . ? 
F2 Sn1 O101 78.63(7) . . ? 
F1 Sn1 O101 164.58(7) . . ? 
C101 Sn1 O101 73.79(11) . . ? 
C1 Sn1 O101 87.38(11) . . ? 
O1 Sn1 O101 115.14(7) . . ? 
C3 O1 C4 114.8(3) . . ? 
C3 O1 Sn1 107.41(18) . . ? 
C4 O1 Sn1 123.83(19) . . ? 
C2 C1 Sn1 115.7(2) . . ? 
C2 C1 H1A 108.3 . . ? 
Sn1 C1 H1A 108.3 . . ? 
C2 C1 H1B 108.3 . . ? 
Sn1 C1 H1B 108.3 . . ? 
H1A C1 H1B 107.4 . . ? 
C5 O2 C6 114.0(3) . . ? 
C3 C2 C10 111.5(3) . . ? 
C3 C2 C1 111.1(3) . . ? 
C10 C2 C1 112.9(3) . . ? 
C3 C2 H2A 107.0 . . ? 
C10 C2 H2A 107.0 . . ? 
C1 C2 H2A 107.0 . . ? 
C8 O3 C7 113.6(3) . . ? 
O1 C3 C2 107.2(3) . . ? 
O1 C3 H3A 110.3 . . ? 
C2 C3 H3A 110.3 . . ? 
O1 C3 H3B 110.3 . . ? 
C2 C3 H3B 110.3 . . ? 
H3A C3 H3B 108.5 . . ? 
C10 O4 C9 114.4(3) . . ? 
O1 C4 C5 112.9(3) . . ? 
O1 C4 H4A 109.0 . . ? 
C5 C4 H4A 109.0 . . ? 
O1 C4 H4B 109.0 . . ? 
C5 C4 H4B 109.0 . . ? 
H4A C4 H4B 107.8 . . ? 
O2 C5 C4 107.9(3) . . ? 
O2 C5 H5A 110.1 . . ? 
C4 C5 H5A 110.1 . . ? 
O2 C5 H5B 110.1 . . ? 
C4 C5 H5B 110.1 . . ? 
H5A C5 H5B 108.4 . . ? 
O2 C6 C7 107.7(3) . . ? 
O2 C6 H6A 110.2 . . ? 
C7 C6 H6A 110.2 . . ? 
O2 C6 H6B 110.2 . . ? 
C7 C6 H6B 110.2 . . ? 
H6A C6 H6B 108.5 . . ? 
O3 C7 C6 113.3(3) . . ? 
O3 C7 H7A 108.9 . . ? 
C6 C7 H7A 108.9 . . ? 
O3 C7 H7B 108.9 . . ? 
C6 C7 H7B 108.9 . . ? 
H7A C7 H7B 107.7 . . ? 
O3 C8 C9 109.5(3) . . ? 
O3 C8 H8A 109.8 . . ? 
C9 C8 H8A 109.8 . . ? 
O3 C8 H8B 109.8 . . ? 
C9 C8 H8B 109.8 . . ? 
H8A C8 H8B 108.2 . . ? 
O4 C9 C8 112.4(3) . . ? 
O4 C9 H9A 109.1 . . ? 
C8 C9 H9A 109.1 . . ? 
O4 C9 H9B 109.1 . . ? 
C8 C9 H9B 109.1 . . ? 
H9A C9 H9B 107.9 . . ? 
O4 C10 C2 107.3(3) . . ? 
O4 C10 H10A 110.3 . . ? 
C2 C10 H10A 110.3 . . ? 
O4 C10 H10B 110.3 . . ? 
C2 C10 H10B 110.3 . . ? 
H10A C10 H10B 108.5 . . ? 
C104 O101 C103 114.7(3) . . ? 
C104 O101 Sn1 122.26(19) . . ? 
C103 O101 Sn1 108.68(19) . . ? 
C102 C101 Sn1 114.8(2) . . ? 
C102 C101 H10C 108.6 . . ? 
Sn1 C101 H10C 108.6 . . ? 
C102 C101 H10D 108.6 . . ? 
Sn1 C101 H10D 108.6 . . ? 
H10C C101 H10D 107.6 . . ? 
C105 O102 C106 113.6(3) . . ? 
C103 C102 C110 111.0(3) . . ? 
C103 C102 C101 111.3(3) . . ? 
C110 C102 C101 112.4(3) . . ? 
C103 C102 H10E 107.3 . . ? 
C110 C102 H10E 107.3 . . ? 
C101 C102 H10E 107.3 . . ? 
C107 O103 C108 113.9(3) . . ? 
O101 C103 C102 107.0(3) . . ? 
O101 C103 H10F 110.3 . . ? 
C102 C103 H10F 110.3 . . ? 
O101 C103 H10G 110.3 . . ? 
C102 C103 H10G 110.3 . . ? 
H10F C103 H10G 108.6 . . ? 
C109 O104 C110 114.5(3) . . ? 
O101 C104 C105 111.2(3) . . ? 
O101 C104 H10H 109.4 . . ? 
C105 C104 H10H 109.4 . . ? 
O101 C104 H10I 109.4 . . ? 
C105 C104 H10I 109.4 . . ? 
H10H C104 H10I 108.0 . . ? 
O102 C105 C104 108.9(3) . . ? 
O102 C105 H10J 109.9 . . ? 
C104 C105 H10J 109.9 . . ? 
O102 C105 H10K 109.9 . . ? 
C104 C105 H10K 109.9 . . ? 
H10J C105 H10K 108.3 . . ? 
O102 C106 C107 108.7(3) . . ? 
O102 C106 H10L 110.0 . . ? 
C107 C106 H10L 110.0 . . ? 
O102 C106 H10M 110.0 . . ? 
C107 C106 H10M 110.0 . . ? 
H10L C106 H10M 108.3 . . ? 
O103 C107 C106 114.0(3) . . ? 
O103 C107 H10N 108.8 . . ? 
C106 C107 H10N 108.8 . . ? 
O103 C107 H10O 108.8 . . ? 
C106 C107 H10O 108.8 . . ? 
H10N C107 H10O 107.7 . . ? 
O103 C108 C109 108.5(3) . . ? 
O103 C108 H10P 110.0 . . ? 
C109 C108 H10P 110.0 . . ? 
O103 C108 H10Q 110.0 . . ? 
C109 C108 H10Q 110.0 . . ? 
H10P C108 H10Q 108.4 . . ? 
O104 C109 C108 112.5(3) . . ? 
O104 C109 H10R 109.1 . . ? 
C108 C109 H10R 109.1 . . ? 
O104 C109 H10S 109.1 . . ? 
C108 C109 H10S 109.1 . . ? 
H10R C109 H10S 107.8 . . ? 
O104 C110 C102 107.4(3) . . ? 
O104 C110 H11A 110.2 . . ? 
C102 C110 H11A 110.2 . . ? 
O104 C110 H11B 110.2 . . ? 
C102 C110 H11B 110.2 . . ? 
H11A C110 H11B 108.5 . . ? 
 
loop_ 
 _geom_torsion_atom_site_label_1 
 _geom_torsion_atom_site_label_2 
 _geom_torsion_atom_site_label_3 
 _geom_torsion_atom_site_label_4 
 _geom_torsion 
 _geom_torsion_site_symmetry_1 
 _geom_torsion_site_symmetry_2 
 _geom_torsion_site_symmetry_3 
 _geom_torsion_site_symmetry_4 
 _geom_torsion_publ_flag 
F2 Sn1 O1 C3 -46.6(4) . . . . ? 
F1 Sn1 O1 C3 -89.0(2) . . . . ? 
C101 Sn1 O1 C3 169.4(2) . . . . ? 
C1 Sn1 O1 C3 19.0(2) . . . . ? 
O101 Sn1 O1 C3 98.2(2) . . . . ? 
F2 Sn1 O1 C4 91.0(3) . . . . ? 
F1 Sn1 O1 C4 48.6(2) . . . . ? 
C101 Sn1 O1 C4 -53.0(2) . . . . ? 
C1 Sn1 O1 C4 156.7(3) . . . . ? 
O101 Sn1 O1 C4 -124.1(2) . . . . ? 
F2 Sn1 C1 C2 175.5(2) . . . . ? 
F1 Sn1 C1 C2 84.4(2) . . . . ? 
C101 Sn1 C1 C2 -50.7(4) . . . . ? 
O1 Sn1 C1 C2 10.7(2) . . . . ? 
O101 Sn1 C1 C2 -106.4(2) . . . . ? 
Sn1 C1 C2 C3 -39.4(3) . . . . ? 
Sn1 C1 C2 C10 86.7(3) . . . . ? 
C4 O1 C3 C2 174.4(2) . . . . ? 
Sn1 O1 C3 C2 -43.6(3) . . . . ? 
C10 C2 C3 O1 -71.1(3) . . . . ? 
C1 C2 C3 O1 55.8(3) . . . . ? 
C3 O1 C4 C5 -71.2(4) . . . . ? 
Sn1 O1 C4 C5 153.9(2) . . . . ? 
C6 O2 C5 C4 164.6(3) . . . . ? 
O1 C4 C5 O2 -51.3(4) . . . . ? 
C5 O2 C6 C7 -163.1(3) . . . . ? 
C8 O3 C7 C6 78.5(4) . . . . ? 
O2 C6 C7 O3 60.5(4) . . . . ? 
C7 O3 C8 C9 -166.7(3) . . . . ? 
C10 O4 C9 C8 -96.2(4) . . . . ? 
O3 C8 C9 O4 74.6(4) . . . . ? 
C9 O4 C10 C2 175.4(3) . . . . ? 
C3 C2 C10 O4 -72.1(4) . . . . ? 
C1 C2 C10 O4 162.0(3) . . . . ? 
F2 Sn1 O101 C104 38.5(2) . . . . ? 
F1 Sn1 O101 C104 75.7(4) . . . . ? 
C101 Sn1 O101 C104 148.0(2) . . . . ? 
C1 Sn1 O101 C104 -61.0(2) . . . . ? 
O1 Sn1 O101 C104 -131.9(2) . . . . ? 
F2 Sn1 O101 C103 -98.9(2) . . . . ? 
F1 Sn1 O101 C103 -61.6(4) . . . . ? 
C101 Sn1 O101 C103 10.7(2) . . . . ? 
C1 Sn1 O101 C103 161.7(2) . . . . ? 
O1 Sn1 O101 C103 90.7(2) . . . . ? 
F2 Sn1 C101 C102 91.8(2) . . . . ? 
F1 Sn1 C101 C102 -176.3(2) . . . . ? 
C1 Sn1 C101 C102 -40.6(4) . . . . ? 
O1 Sn1 C101 C102 -98.2(2) . . . . ? 
O101 Sn1 C101 C102 18.7(2) . . . . ? 
Sn1 C101 C102 C103 -47.7(3) . . . . ? 
Sn1 C101 C102 C110 77.6(3) . . . . ? 
C104 O101 C103 C102 -177.4(3) . . . . ? 
Sn1 O101 C103 C102 -36.5(3) . . . . ? 
C110 C102 C103 O101 -70.8(4) . . . . ? 
C101 C102 C103 O101 55.2(4) . . . . ? 
C103 O101 C104 C105 -104.3(3) . . . . ? 
Sn1 O101 C104 C105 120.7(2) . . . . ? 
C106 O102 C105 C104 -161.3(3) . . . . ? 
O101 C104 C105 O102 69.3(4) . . . . ? 
C105 O102 C106 C107 164.0(3) . . . . ? 
C108 O103 C107 C106 -57.8(4) . . . . ? 
O102 C106 C107 O103 -51.8(4) . . . . ? 
C107 O103 C108 C109 -176.8(3) . . . . ? 
C110 O104 C109 C108 -81.7(4) . . . . ? 
O103 C108 C109 O104 -66.3(4) . . . . ? 
C109 O104 C110 C102 157.4(3) . . . . ? 
C103 C102 C110 O104 -68.7(4) . . . . ? 
C101 C102 C110 O104 165.9(3) . . . . ? 
 
_diffrn_measured_fraction_theta_max    1.000 
_diffrn_reflns_theta_full              25.49 
_diffrn_measured_fraction_theta_full   1.000 
_refine_diff_density_max    0.841 
_refine_diff_density_min   -0.487 
_refine_diff_density_rms    0.084 
#===END
